# Supplementary material
Source: publisher figshare collection journal article supplement (https://acs.figshare.com/ndownloader/files/5175118)

## SUPPORTING INFORMATION

### Cyclopentane Construction by Rh-Catalyzed Intramolecular C-H Insertion:

#### Relative Reactivity of a Range of Catalysts

#### Supporting Information

##### Contents:

|        |                                              |
|--------|----------------------------------------------|
| S-1    | Table of Contents                            |
| S-2    | General Experimental                         |
| S-3-19 | Preparation of <b>1</b> and product analysis |
| S-20   | <sup>1</sup> H NMR spectrum of <b>1</b>      |
| S-21   | <sup>13</sup> C NMR spectrum of <b>1</b>     |
| S-22   | <sup>1</sup> H NMR spectrum of <b>2</b>      |
| S-23   | <sup>13</sup> C NMR spectrum of <b>2</b>     |
| S-24   | <sup>1</sup> H NMR spectrum of <b>12</b>     |
| S-25   | <sup>13</sup> C NMR spectrum of <b>12</b>    |
| S-26   | <sup>1</sup> H NMR spectrum of <b>13</b>     |
| S-27   | <sup>13</sup> C NMR spectrum of <b>13</b>    |
| S-28   | <sup>1</sup> H NMR spectrum of <b>14</b>     |
| S-29   | <sup>13</sup> C NMR spectrum of <b>14</b>    |
| S-30   | <sup>1</sup> H NMR spectrum of <b>15</b>     |
| S-31   | <sup>13</sup> C NMR spectrum of <b>15</b>    |
| S-32   | <sup>1</sup> H NMR spectrum of <b>16a</b>    |
| S-33   | <sup>13</sup> C NMR spectrum of <b>16a</b>   |
| S-34   | <sup>1</sup> H NMR spectrum of <b>17a</b>    |
| S-35   | <sup>13</sup> C NMR spectrum of <b>17a</b>   |
| S-36   | <sup>1</sup> H NMR spectrum of <b>18</b>     |
| S-37   | <sup>13</sup> C NMR spectrum of <b>18</b>    |
| S-38   | <sup>1</sup> H NMR spectrum of <b>19a</b>    |
| S-39   | <sup>13</sup> C NMR spectrum of <b>19a</b>   |
| S-40   | <sup>1</sup> H NMR spectrum of <b>20</b>     |
| S-41   | <sup>13</sup> C NMR spectrum of <b>20</b>    |

## Experimental Section

**General.**  $^1\text{H}$  and  $^{13}\text{C}$  NMR spectra were recorded as solutions in  $\text{CDCl}_3$  at 400 and 100 MHz, respectively.  $^{13}\text{C}$  multiplicities were determined with the aid of a JVERT sequence, differentiating the signals for methylene and quaternary carbons as up (u), from methyl and methine carbons as down (d). The infrared (IR) spectra were determined as neat oils. Mass spectra (MS) were obtained by chemical ionization.  $R_f$  values indicated refer to thin-layer chromatography on  $2.5 \times 10$  cm,  $250\text{-}\mu\text{m}$  analytical plates coated with silica gel GF and developed in the solvent indicated. The HPLC analysis on the alcohol mixture was performed using a normal phase  $10\mu$  silica gel column with 5 % EtOAc in hexanes as the eluant and monitoring at 254 nm. The flow rates for the analytical columns were 1 mL/min and preparative HPLC was 2.5 mL/min. Column chromatography was performed with Merck 35- $60\mu$  silica gel, following the procedure of Still.<sup>1a</sup> Where specified, TLC mesh silica was employed, following the procedure described by Taber.<sup>1b</sup> Solvent mixtures are volume/volume. PE is petroleum ether. EtOAc is ethyl acetate. THF and diethyl ether were distilled from sodium/benzophenone under  $\text{N}_2$  and used immediately.  $\text{CH}_2\text{Cl}_2$  was distilled from  $\text{CaH}_2$  under  $\text{N}_2$  immediately before use and passed through a pad of activated (110 °C, 12h)  $\text{K}_2\text{CO}_3$  immediately before use. All reactions were carried out in flame-dried glassware under a positive pressure of  $\text{N}_2$  unless otherwise indicated.

### Preparation of $\alpha$ -Diazo Ester 1

The preparation of **1** was accomplished in nine steps from *p*-methoxy benzaldehyde and methyl isobutyl ketone (MIBK) (Scheme 2). Deprotonation of MIBK with LDA followed by addition of the enolate to *p*-methoxy benzaldehyde gave the  $\beta$ -hydroxy ketone, which dehydrated smoothly to give the corresponding enone.

SCHEME 2<sup>a</sup>

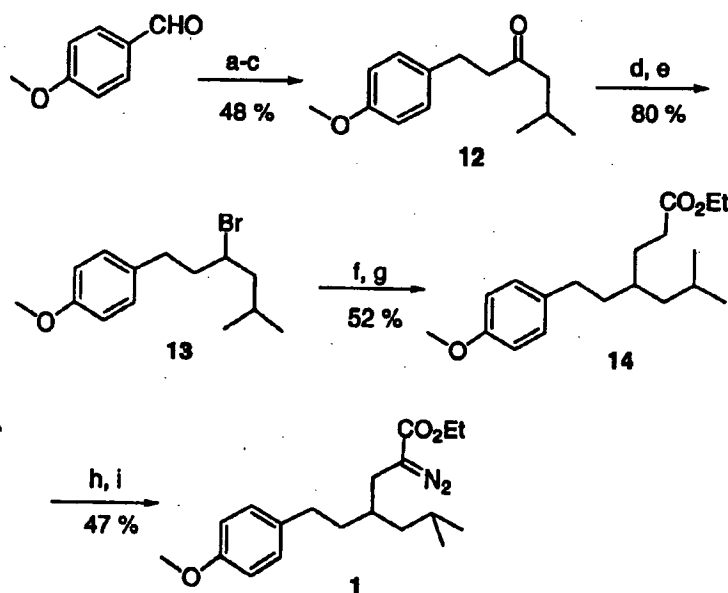

<sup>a</sup> Conditions : a) LDA, THF, -78 C, methyl isobutyl ketone; b) *p*-TsOH, THF; c) H<sub>2</sub>, Pd/C, MeOH; d) NaBH<sub>4</sub>, MeOH; e) CBr<sub>4</sub>, Ph<sub>3</sub>P, CH<sub>2</sub>Cl<sub>2</sub>; f) NaI, acetone; g) FeCl<sub>3</sub>, pyridine, Zn dust, NaI, ethyl acrylate; h) LHMDs, CF<sub>3</sub>CO<sub>2</sub>CH<sub>2</sub>CF<sub>3</sub>; i) DBU, pNBSA, CH<sub>2</sub>Cl<sub>2</sub>.

Hydrogenation then gave the desired ketone **12** in 48% overall yield (3 steps) from *p*-anisaldehyde. The ketone was reduced with NaBH<sub>4</sub> and the resulting alcohol was converted to the bromide **13**. Conversion of the bromide to the iodide followed by an iron-mediated radical addition to ethyl acrylate<sup>2</sup> gave the three-carbon homologated ester

14. Finally, diazo transfer<sup>3</sup> was accomplished using a procedure developed in our laboratories, to give the desired ester **1**.

#### **Product Analysis**

The diazo ester **1** upon exposure to a Rh(II) catalyst (Scheme 3) underwent intramolecular C-H insertion to give the CH and CH<sub>2</sub> insertion products **3**, **4** and **5** along with the elimination product **2**.

**SCHEME 3'**

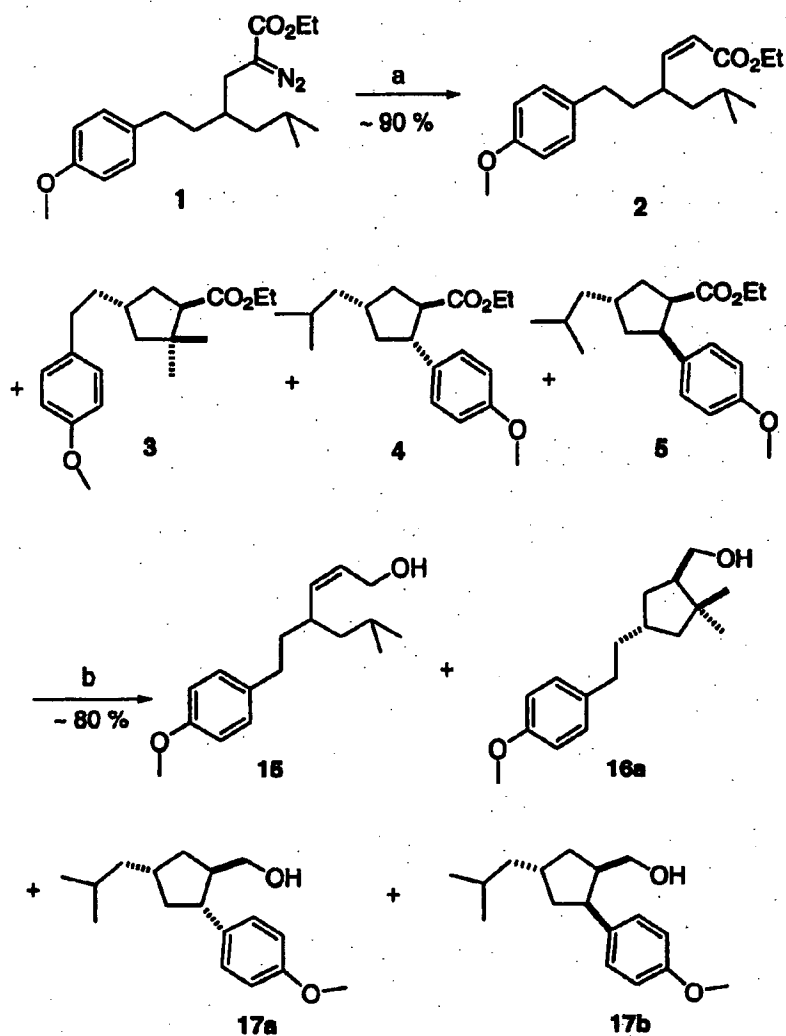

<sup>a</sup> Conditions: a)  $\text{Rh}_2\text{L}_4$ ,  $\text{CH}_2\text{Cl}_2$ , r.t.; b)  $\text{LiAlH}_4$ , THF.

The esters were not resolved by conventional chromatography techniques. The mixture was therefore reduced with  $\text{LiAlH}_4$  to give the corresponding mixture of alcohols. Oxidation with  $\text{MnO}_2$  was used to remove **15** from the mixture.

The mixture of alcohols **16** and **17** was converted (**Scheme 4**) to the corresponding 3, 5-dinitrobenzoate esters **18** and **20**. These esters could be separated by silica gel chromatography. The purified major diastereomers **18** and **20** were converted back to the alcohols **16a** and **17a** by exposure to potassium carbonate in methanol. Thus, it was possible to obtain pure samples of the major CH and CH<sub>2</sub> insertion products for characterization and for HPLC analysis. The relative configurations of **16** and **17** were assigned by analogy to our previous work.<sup>3a</sup>

**SCHEME 4\***

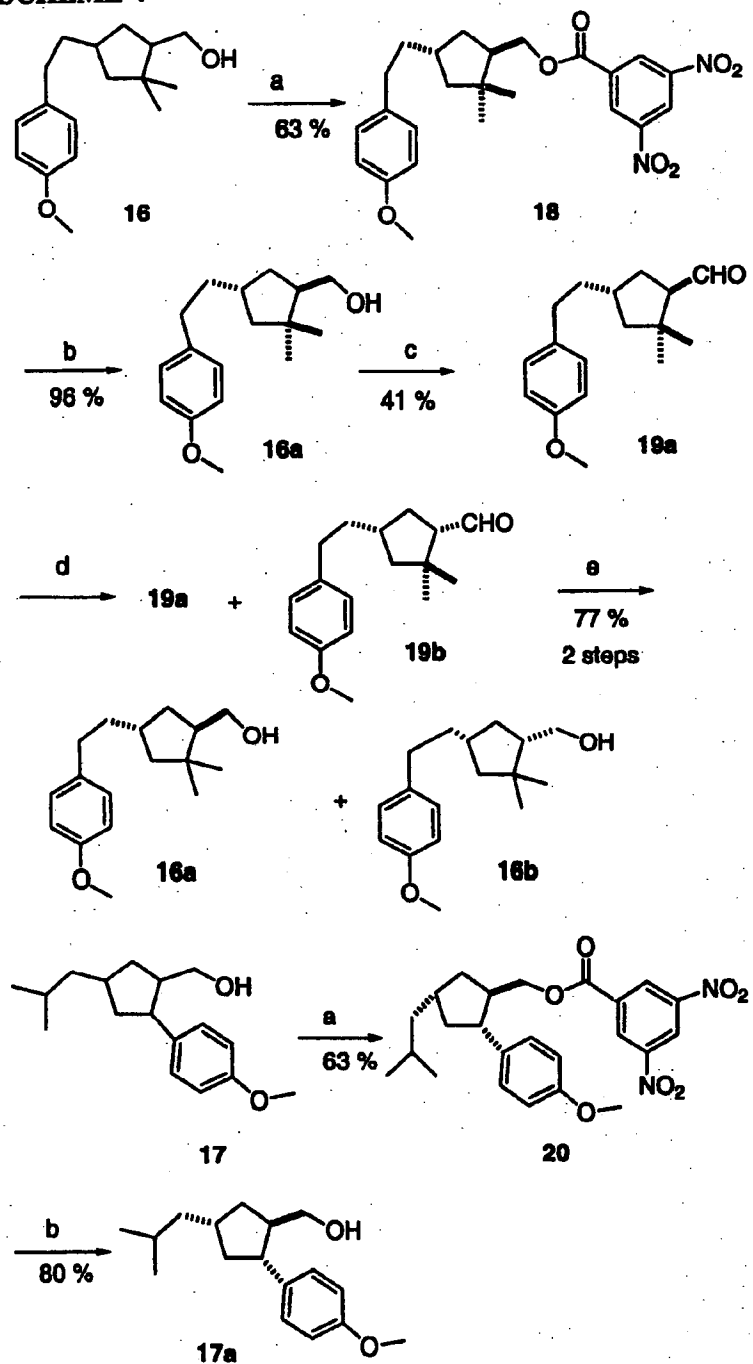

\*Conditions: a) 3, 5-Dinitrobenzoyl chloride, pyridine, DMAP (cat) 12h; b)  $K_2CO_3$ , MeOH; c) DMP,  $CH_2Cl_2$ , r.t ; d) KO<sup>t</sup>Bu, THF; e)  $LiAlH_4$ , THF.

The pure alcohol **16a** (Scheme 4) was oxidized by Dess-Martin periodinane<sup>4</sup> to give the corresponding aldehyde **19a**. The aldehyde **19a** was epimerized by treating with potassium *tert*-butoxide in THF to give a mixture of aldehydes **19a** and **19b**. The mixture was reduced with LiAlH<sub>4</sub> to provide an authentic mixture of alcohols **16a** and **16b**. This allowed the identification of these two peaks in the HPLC chromatogram.

The HPLC analysis on the alcohol mixture was performed using a normal phase 10 $\mu$  silica gel column with 5 % EtOAc in hexanes as the eluant, monitoring at 254 nm. The methylene insertion products **17c** ( $r_t$  = 30.5 min(minor-cis)), **17b** ( $r_t$  = 36.8 min (major-cis)) and **17a** ( $r_t$  = 38.7 min(major-trans)) eluted before the methine insertion products **16a** ( $r_t$  = 43.3 min (major)) and **16b** ( $r_t$  = 41.9 min (minor)). Alcohols **16a** and **17a** were always the dominant products from the cyclization. Alcohol **17d** was not observed.

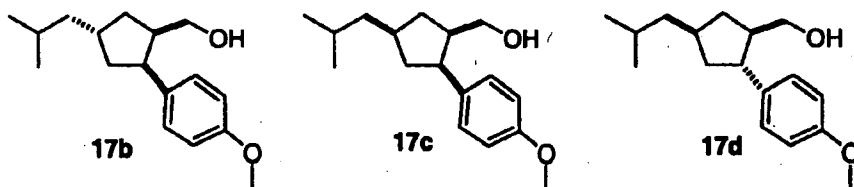

This peak assignment was supported by <sup>1</sup>H NMR analysis of the pure alcohols separated by preparative HPLC. The major methine insertion diastereomer **16a** had a unique proton (in the mixture from cyclization) at  $\delta$  3.71, while the minor methine insertion diastereomer **16b** had a unique proton at  $\delta$  1.90. In the methylene insertion series, the major methylene insertion diastereomer **17a** had a unique proton at  $\delta$  2.67 while the cis methylene insertion diastereomer **17b** had a unique proton at  $\delta$  2.47 and the cis methylene insertion diastereomer **17c** had a unique proton at  $\delta$  3.33. Thus, the sum of the methine integrations divided by the sum of the methylene integrations gave us the



ratio of CH/ CH<sub>2</sub>. While the HPLC ratios were more precise, the <sup>1</sup>H NMR ratios (see below) tracked reasonably well, and could be sufficient if a new Rh (II) catalyst was to be characterized.

### Experimental Section

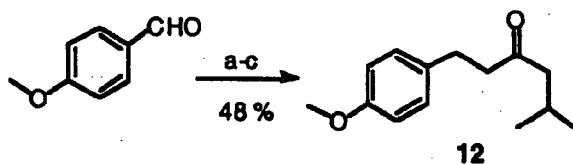

**Synthesis of Ketone (12).** *n*-BuLi (54.8 mL, 120 mmol, 2.19 M in hexanes) was added slowly to diisopropylamine (16.8 mL, 120 mmol) in 55 mL of THF at  $-78^{\circ}\text{C}$ . The mixture was stirred under N<sub>2</sub> for 30 min, then methyl isobutyl ketone (130 mL, 105 mmol) was added over 20 min. The reaction mixture was stirred for 30 min, then *p*-anisaldehyde (11.6 mL, 95 mmol) was added dropwise over 5 min. The reaction mixture was allowed to stir and come to room temperature over 1h. It was then quenched carefully by addition of 40 mL of saturated aqueous NH<sub>4</sub>Cl. The mixture was partitioned between MTBE and, sequentially, saturated aqueous NH<sub>4</sub>Cl and brine. The combined organic extract was dried (Na<sub>2</sub>SO<sub>4</sub>) and concentrated to give 23.7 g of crude hydroxy ketone as an orange oil, TLC *R<sub>f</sub>* = 0.44 (30% MTBE/ PE).

To 23.0 g (100.4 mmol) of the crude hydroxy ketone in 250 mL of dry THF was added in four portions *p*-TsOH (9.45 g, 36.8 mmol) over 10 min. The reaction mixture was heated to reflux for two hours, then cooled to  $0^{\circ}\text{C}$  and quenched carefully with saturated aqueous NaHCO<sub>3</sub>. The resulting mixture was partitioned between MTBE and, sequentially, saturated aqueous NaHCO<sub>3</sub> and brine. The combined organic extract was

dried ( $\text{Na}_2\text{SO}_4$ ) and concentrated to give 18.9 g of the crude enone as an orange oil, TLC  $R_f = 0.46$  (30% MTBE/ PE).

To 18.3 g (83.9 mmol) of the crude enone in 300 mL of methanol was added 1.77 g of 5 % Pd/C. The suspension was stirred under an  $\text{H}_2$  balloon at room temperature for 1.5 h (TLC control). The reaction mixture was filtered through a pad of Celite, then concentrated *in vacuo*. The residue was chromatographed to give 9.89 g (47% over 3 steps from *p*-anisaldehyde) of the desired ketone **12** as a clear oil, TLC  $R_f = 0.65$  (30% MTBE/ PE).  $^1\text{H}$  NMR:  $\delta$  7.11 (2 H, d,  $J = 8.3$  Hz); 6.83 (2 H, d,  $J = 8.3$  Hz); 3.79 (3 H, s); 2.84 (2 H, t,  $J = 7.5$  Hz); 2.68 (2 H, t,  $J = 7.5$  Hz); 2.26 (2 H, t,  $J = 6.9$  Hz); 2.11 (1 H, m); 0.91 (3 H, s); 0.89 (3 H, s).  $^{13}\text{C}$  NMR:  $\delta$  d 22.6, 24.6, 55.3, 113.9, 129.3, u 28.9, 45.1, 52.1, 133.3, 157.9, 210.2. IR: 2952, 2869, 1711, 1610, 1515  $\text{cm}^{-1}$ . MS ( $m/z$ ): 221 ( $M + \text{H}^+$ ), 162, 135, 121 (100%), 84. HRMS calculated for  $\text{C}_{14}\text{H}_{20}\text{O}_2$  220.1465, found 220.1463.

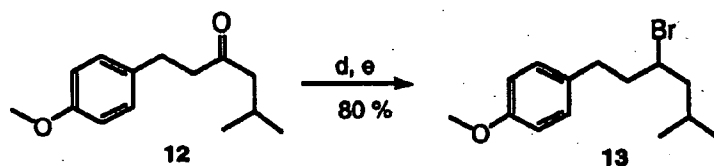

**Synthesis of Bromide (13).** To ketone **12** (910 mg, 4.14 mmol) in 16 mL of methanol at 0 °C was added  $\text{NaBH}_4$  (311 mg, 8.26 mmol) in one portion. The reaction mixture was stirred from 0 °C to 10 °C for 50 min (TLC control). The mixture was then partitioned between MTBE and, sequentially, saturated aqueous  $\text{NH}_4\text{Cl}$  and brine. The combined organic extract was dried ( $\text{Na}_2\text{SO}_4$ ) and concentrated to give an oil. The residue was

chromatographed to give 869 mg (94% yield) of the alcohol as a clear oil, TLC  $R_f$  = 0.21 (15% MTBE/ PE).

To the alcohol (5.88 g, 26.5 mmol) in 88 mL of  $\text{CH}_2\text{Cl}_2$  at 0 °C was added 9.0 g (34.4 mmol) of  $\text{Ph}_3\text{P}$  in one portion followed by  $\text{CBr}_4$  (10.5 g, 34.3 mmol) in three portions over 5 min. The reaction mixture was stirred at 0 °C for 3 h. The solvent was then removed and the residue was chromatographed to give 6.35 g (85% yield) of the bromide **13** as a colorless oil, TLC  $R_f$  = 0.79 (15% MTBE/ PE).  $^1\text{H}$  NMR :  $\delta$  7.12 (2 H, d,  $J$  = 8.5 Hz); 6.83 (2 H, d,  $J$  = 8.5 Hz); 4.02 (1 H, m); 3.78 (3 H, s); 2.84 (1 H, m); 2.7 (1 H, m); 2.06 (2 H, m); 1.87 (2 H, m); 1.54 (1 H, ddd,  $J$  = 4.7, 8.5, 14.0 Hz); 0.89 (3 H, d,  $J$  = 6.5 Hz); 0.85 (3 H, d,  $J$  = 6.5 Hz).  $^{13}\text{C}$  NMR :  $\delta$  21.5, 23.2, 26.6, 55.4, 56.3, 114.0, 129.6, 132.9, 41.6, 48.4, 133.3, 158.1. IR: 2956, 1614, 1505, 1369, 1240  $\text{cm}^{-1}$ . HRMS calculated for  $\text{C}_{14}\text{H}_{21}\text{OBr}$  284.0776, found 284.0774.

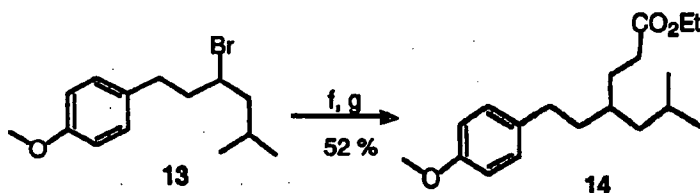

**Synthesis of ester (14).** To bromide **13** (2.59 g, 9.12 mmol) in 30 mL of acetone at room temperature was added 100 mg of Cu powder, followed by NaI (2.04 g, 13.7 mmol). The reaction mixture was heated to reflux for 12 h, then the solids were filtered off and the filtrate was concentrated. The residue was chromatographed to give 2.61 g (74% yield) of the iodide as a yellow oil, TLC  $R_f$  = 0.48 (2% MTBE/ PE).

To  $\text{FeCl}_3$  (3.24 g, 12 mmol) in 23 mL of pyridine was added NaI (3.6 g, 24 mmol) at room temperature. To this reaction mixture was added Zn dust (9.18 g, 145 mmol) in

four portions, which resulted in an exotherm. This was followed by the addition of a mixture of the above iodide (8.0 g, 24 mmol) and ethyl acrylate (28.0 mL, 265 mmol) over 5 min. The dark brown reaction mixture was stirred for 1 h at room temperature. The mixture was then partitioned between MTBE and, sequentially, aqueous 3N HCl and brine. The combined organic extract was dried ( $\text{Na}_2\text{SO}_4$ ) and concentrated. The residue was chromatographed to give 3.83 g (52% yield from bromide 13) of the desired ester 14 as a clear oil, TLC  $R_f$  = 0.51 (6% MTBE/ PE).  $^1\text{H}$  NMR :  $\delta$  7.1 (2 H, d,  $J$  = 8.6 Hz); 6.83 (2 H, d,  $J$  = 8.6 Hz); 4.14 (2 H, q,  $J$  = 7.1 Hz); 3.79 (3 H, s); 2.54 (2 H, dt,  $J$  = 1.6, 8.0 Hz); 2.3 (2 H, t,  $J$  = 8.0 Hz); 1.65 (3 H, m); 1.57 (2 H, m); 1.54 (2 H, m); 1.27 (3 H, t,  $J$  = 7.1 Hz); 1.2 (1 H, m); 0.87 (6 H, t,  $J$  = 6.3 Hz).  $^{13}\text{C}$  NMR :  $\delta$  d 14.5, 23.1, 25.4, 34.4, 55.4, 113.9, 129.4, u 28.9, 32.0, 35.9, 43.4, 60.4, 135.1, 157.8, 174.3. IR: 2954, 1724, 1609, 1515, 1467  $\text{cm}^{-1}$ . HRMS calculated for  $\text{C}_{19}\text{H}_{30}\text{O}_3$  329.2093, found 329.2095. Anal. Calcd for  $\text{C}_{19}\text{H}_{30}\text{O}_3$  : C, 74.47; H, 9.87, Found : C, 74.14; H, 10.21.

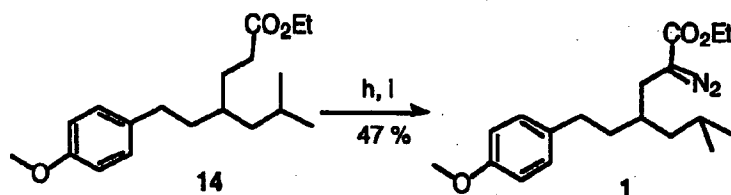

**Synthesis of Diazo Ester (1).** To lithium bis(trimethylsilyl) amide (19.9 mmol) in 60 mL of THF at  $-78\text{ }^{\circ}\text{C}$  was added ester 14 (1.46 g, 4.76 mmol) in 10 mL of THF over 5 min. After 40 min, the reaction mixture was warmed to  $-40\text{ }^{\circ}\text{C}$ , and 2,2,2-trifluoroethyltrifluoroacetate (0.89 mL, 6.6 mmol) was added. After 12 h at RT, the mixture was partitioned between saturated  $\text{NH}_4\text{Cl}$  and MTBE. The combined organic extract was dried ( $\text{NaSO}_4$ ) and concentrated. The residue was dissolved in 15 mL of

CH<sub>2</sub>Cl<sub>2</sub> at 0 °C and DBU (1.4 mL, 9.2 mmol) was added in the dark. After 10 min, *p*-nitrobenzenesulfonyl azide (3.13 g, 13.7 mmol) was added. After 12 h at RT, the mixture was partitioned between MTBE and 1N aqueous NaOH. The combined organic extract was dried (NaSO<sub>4</sub>) and concentrated. The residue was chromatographed to give 744 mg (47 % yield) of diazoester 1 as a bright yellow oil, TLC *R<sub>f</sub>* = 0.14 (4% MTBE/ PE). <sup>1</sup>H NMR δ 7.09 (2 H, d, *J* = 8.5 Hz); 6.83 (2 H, d, *J* = 8.5 Hz); 4.23 (2 H, q, *J* = 7.1 Hz); 3.79 (3 H, s); 2.55 (2 H, m); 2.31 (2 H, m); 1.59 (4 H, m); 1.28 (3 H, t, *J* = 7.1 Hz); 1.22 (2 H, m); 0.89 (3 H, d, *J* = 6.6 Hz); 0.86 (3 H, d, *J* = 6.6 Hz). <sup>13</sup>C NMR δ d 14.6, 22.9, 25.4, 34.7, 55.3, 113.8, 129.3, u 27.8, 31.8, 35.7, 43.1, 60.4, 60.9, 134.6, 157.8, 174.3. IR : 2947, 2076, 1685, 1604, 1500 cm<sup>-1</sup>. HRMS calculated for C<sub>19</sub>H<sub>28</sub>O<sub>3</sub>N<sub>2</sub> 355.1989, found 355.1998

**Representative Procedure for the Rh(II)-mediated insertion reactions.** To Rh<sub>2</sub>Oct<sub>4</sub> (1.3 mg, μmol) in 1 mL of CH<sub>2</sub>Cl<sub>2</sub> was added dropwise the diazo ester 1 (86 mg, 0.26 mmol) in 2.1 mL of CH<sub>2</sub>Cl<sub>2</sub> over 20 min at room temperature. The reaction mixture was stirred for 12 h (TLC and IR control) and then the solvent was removed. The residue was chromatographed to give 68 mg (87% yield) of the mixture of alkene (2) and the insertion product (CH+CH<sub>2</sub>). HPLC analysis and <sup>1</sup>H NMR analysis of this mixture gave the desired I/A ratios. For 2 : TLC, *R<sub>f</sub>* = 0.4 (5% MTBE/PE). <sup>1</sup>H NMR δ 7.08 (2 H, d, *J* = 8.5 Hz); 6.81 (2 H, d, *J* = 8.5 Hz); 5.93 (1 H, t, *J* = 11.6 Hz); 5.82 (1 H, d, *J* = 11.6 Hz); 4.16 (2 H, q, *J* = 7.2 Hz); 3.79 (3 H, s); 3.63 (1 H, m); 1.49 (2 H, m); 1.28 (3 H, t, *J* = 7.2 Hz); 0.88 (6 H, dd, *J* = 2.6, 6.5 Hz); 1.23 (2 H, m). <sup>13</sup>C NMR δ d 14.5, 22.3, 23.6, 26.1, 36.3, 55.4, 113.8, 120.1, 129.3, 154.8, u 32.9, 37.9, 44.9, 60.0, 134.9, 157.8, 166.7. IR : 2952, 1718, 1642, 1507, 1460 cm<sup>-1</sup>. HRMS calculated for C<sub>19</sub>H<sub>28</sub>O<sub>3</sub> 260.1776, found

260.1766.

**Representative Procedure for the  $\text{LiAlH}_4$  reduction of the esters.** To the mixture of esters **2-4** (28 mg, 0.091 mmol) in 290  $\mu\text{L}$  THF at 0  $^\circ\text{C}$  was added in one portion 7.8 mg (0.21 mmol) of  $\text{LiAlH}_4$ . The reaction mixture was stirred from 0  $^\circ\text{C}$  to room temperature over 40 min (TLC control) and then diluted with 400  $\mu\text{L}$  of 1 N aqueous HCl. The reaction mixture was extracted with MTBE and the organic layer was washed with brine. The combined organic extract was dried ( $\text{Na}_2\text{SO}_4$ ) and concentrated. The residue was chromatographed to give 24 mg (99% yield) of the alcohol mixture **15-17** as clear oil. For **15**: TLC  $R_f$  = 0.18 (20% MTBE/PE).  $^1\text{H}$  NMR:  $\delta$  7.07 (2 H, d,  $J$  = 8.5 Hz); 6.83 (2 H, d,  $J$  = 8.5 Hz); 5.66 (1 H, dt,  $J$  = 6.8, 10.7 Hz); 5.25 (1 H, t,  $J$  = 10.7 Hz); 4.14 (1 H, t,  $J$  = 6.8 Hz); 2.58 (1 H, m); 2.42 (2 H, m); 1.85 (3 H, m); 1.69 (1 H, m); 1.53 (1 H, m); 1.43 (1 H, m); 0.86 (3 H, d,  $J$  = 6.5 Hz); 0.83 (3 H, d,  $J$  = 6.5 Hz).  $^{13}\text{C}$  NMR  $\delta$  22.2, 23.7, 25.7, 35.3, 55.4, 113.9, 128.7, 129.4, 137.8, 32.8, 37.9, 45.3, 59.3, 134.7, 157.8. IR 2947, 2846, 1603, 1509, 1462  $\text{cm}^{-1}$ . LRMS 262 ( $\text{M}^+$ ), 134, 121 (100 %). HRMS calculated for  $\text{C}_{17}\text{H}_{26}\text{O}_2\text{Na}$  ( $\text{M} + \text{Na}$ ) 285.1841, found 285.1831.

**Representative Procedure for  $\text{MnO}_2$  oxidation of the alcohol mixture.** To the alcohol mixture **15-17** (23.7 mg, 0.087 mmol) in 290  $\mu\text{L}$  of  $\text{CH}_2\text{Cl}_2$  at room temperature was added activated  $\text{MnO}_2$  (26 mg, 0.26 mmol) in one portion. The reaction mixture was stirred at room temperature for 2 h (TLC control) and then the solvent was removed. The residue was chromatographed to give 19.0 mg (83% yield) of the alcohol mixture **16-17**, TLC  $R_f$  = 0.18 (20% MTBE/PE). This alcohol mixture was subjected to  $^1\text{H}$  NMR and HPLC analysis to give the CH/ $\text{CH}_2$  ratios.

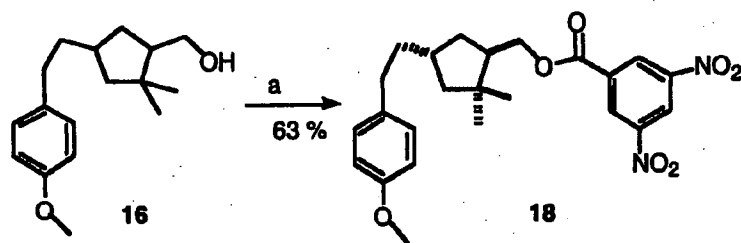

**Synthesis of 18 and 20.** To the mixture of alcohols 16-17 (700 mg, 2.67 mmol) in 10 mL of pyridine was added 3, 5-dinitrobenzoylchloride (1.23 g, 5.34 mmol). The reaction mixture was stirred at room temperature for 12 h and then partitioned between MTBE and, sequentially, 3 N aqueous HCl, and brine. The combined organic extract was dried ( $\text{Na}_2\text{SO}_4$ ) and concentrated. The residue was chromatographed to give 764 mg (63% yield) of the 3,5-dinitrobenzoate esters, including 156 mg of 18, 184 mg of 20 and 424 mg of a mixtures of 18 and 20 with other 3,5-dinitrobenzoate esters. For 18 : TLC  $R_f$  = 0.78 (7% EtOAc/ PE).  $^1\text{H}$  NMR  $\delta$  : 9.23 (1H, t,  $J$  = 2.0 Hz); 9.16 (2H, t,  $J$  = 2.0 Hz); 7.09 (2H, d,  $J$  = 8.4 Hz); 6.82 (2H, d,  $J$  = 8.4 Hz); 3.79 (3H, s); 2.55 (2H, t,  $J$  = 7.8 Hz); 2.09 (2H, m); 1.75 (2H, m); 1.65 (3H, m); 1.24 (1H, t,  $J$  = 11.4 Hz); 1.16 (3H, s); 0.93 (3 H, s).  $^{13}\text{C}$  NMR  $\delta$  d 129.6, 129.4, 122.5, 113.9, 55.4, 47.1, 35.1, 28.9, 22.2, u 162.8, 157.8, 148.9, 134.8, 68.9, 50.2, 41.4, 39.8, 35.1, 34.0. IR 3099, 2929, 1726, 1544, 1346  $\text{cm}^{-1}$ . HRMS calcd for  $\text{C}_{24}\text{H}_{28}\text{N}_2\text{O}_7$ , 456.1897 found 456.1893. For 20: TLC  $R_f$  = 0.65 (7% EtOAc/ PE).  $^1\text{H}$  NMR  $\delta$  : 9.16 (1H, d,  $J$  = 2.6 Hz); 8.79 (2H, d,  $J$  = 2.6 Hz); 7.11 (2H, d,  $J$  = 8.6 Hz); 6.67 (2H, d,  $J$  = 8.6 Hz); 4.47 (1H, m); 4.38 (1H, dd,  $J$  = 8.4, 10.8 Hz); 3.66 (3H, s); 2.73 (1H, m); 2.64 (1H, m); 2.19 (2H, m); 1.69 (2H, m); 1.33 (4H, m); 0.91 (3H, s); 0.89 (3H, s).  $^{13}\text{C}$  NMR  $\delta$  d 128.9, 128.1, 122.1, 113.8, 55.1, 50.8, 44.7, 36.2, 26.9,

23.0, 22.9, u 162.5, 157.9, 148.4, 136.3, 133.8, 70.6, 46.1, 44.5, 35.4. IR 3099, 1726, 1679, 1509, 1462  $\text{cm}^{-1}$ . HRMS calculated for  $\text{C}_{24}\text{H}_{28}\text{N}_2\text{O}_7$  456.1897, found 456.1896.

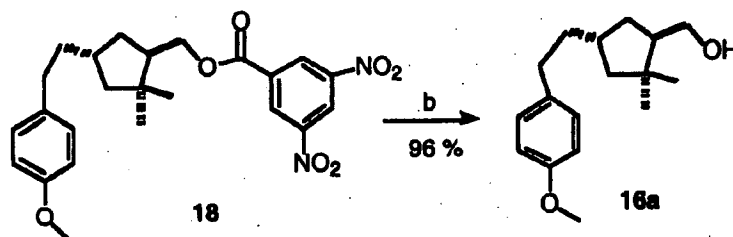

**Synthesis of Alcohol (16a).** To 87 mg of 18 (0.19 mmol) in 700  $\mu\text{L}$  of methanol was added  $\text{K}_2\text{CO}_3$  (140 mg, 1.01 mmol) at room temperature. The reaction mixture was stirred for 1 h (TLC control) after which the solids were filtered off. The residue was chromatographed to give 48 mg (96% yield) of the alcohol 16a as a clear oil, TLC  $R_f$  = 0.55 (30% MTBE/ PE).  $^1\text{H}$  NMR  $\delta$ : 7.09 (2H, d,  $J$  = 6.6 Hz); 6.83 (2H, d,  $J$  = 6.6 Hz); 3.79 (3H, s); 3.72 (1H, dt,  $J$  = 5.5, 10.4 Hz); 3.48 (1H, ddd,  $J$  = 4.8, 8.3, 10.4 Hz); 2.53 (2H, t,  $J$  = 7.9 Hz); 2.01 (1H, m); 1.79 (1H, m); 1.64 (4H, m); 1.16 (2H, m); 1.12 (3H, s); 0.81 (3H, s).  $^{13}\text{C}$  NMR  $\delta$ : 22.1, 29.1, 35.1, 50.8, 55.4, 113.8, 129.4, u 34.1, 35.2, 40.1, 41.1, 50.5, 64.8, 135.1, 157.7. IR: 3384, 2926, 1609, 1457  $\text{cm}^{-1}$ . LRMS 262 ( $\text{M}^+$ ), 244, 187, 134, 121 (100 %), 101, 91. HRMS calculated for  $\text{C}_{17}\text{H}_{26}\text{O}_2$  262.1933, found 262.1924.

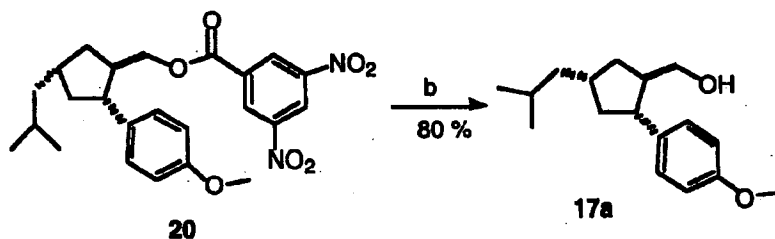



**Synthesis of Alcohol (17a).** To 140 mg of **20** (0.31 mmol) in 1 mL of methanol was added  $K_2CO_3$  (213 mg, 1.54 mmol) at room temperature. The reaction mixture was stirred for 40 min (TLC control) after which the solids were filtered off. The residue was chromatographed to give 65 mg (80% yield) of the alcohol **17a** as a clear oil, TLC  $R_f$  = 0.58 (30% MTBE/ PE).  $^1H$  NMR  $\delta$  : 7.17(2H, d,  $J$  = 8.7 Hz); 6.85 (2H, d,  $J$  = 8.7 Hz); 3.79 (3H, s); 3.61 (1H, m); 3.49 (1H, ddd,  $J$  = 6.5, 10.7, 13.4 Hz); 2.66 (1H, dq,  $J$  = 6.5, 9.5 Hz); 2.16 (3H, m); 1.75 (1H, m); 1.57 (2H, m); 1.29 (3H, t,  $J$  = 7.2 Hz); 0.9 (3H, s); 0.89 (3H, s).  $^{13}C$  NMR  $\delta$  d 128.5, 114.1, 55.5, 49.1, 48.9, 36.5, 27.0, 23.2, 23.0, u 158.1, 137.1, 66.6, 46.2, 44.0, 35.8. IR: 3357, 2866, 1604, 1461  $cm^{-1}$ . LRMS 262 ( $M^+$ ), 244, 203, 187 (100%), 173, 159, 148, 134, 121, 108. HRMS calculated for  $C_{17}H_{26}O_2$  262.1933, found 262.1933.

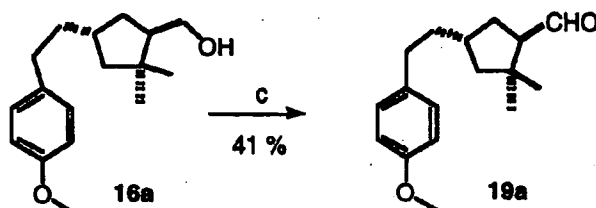

**Synthesis of Aldehyde (19a).** To alcohol **16a** (2.1 mg, 0.008 mmol) in 200  $\mu$ L of  $CH_2Cl_2$  was added Dess-Martin periodinane<sup>8</sup> (5.1 mg, 0.012 mmol) at room temperature. The reaction mixture was stirred for 1 h and then diluted with  $CH_2Cl_2$ . The mixture was partitioned between  $CH_2Cl_2$  and, sequentially, aqueous saturated  $NaHCO_3$ , water and brine. The combined organic extract was dried ( $Na_2SO_4$ ) and concentrated to give an oil. The residue was chromatographed to give 2.0 mg (96% yield) of **19a**. TLC  $R_f$  = 0.78 (20% MTBE/ PE).  $^1H$  NMR  $\delta$  : 9.72 (1H, s); 7.1 (2H, d,  $J$  = 8.5 Hz); 6.84 (2H, d,  $J$  = 8.4

Hz); 3.79 (3H, s); 2.54 (2H, t,  $J = 8.4$  Hz); 2.46 (1H, ddd,  $J = 2.7, 8.4, 11.8$  Hz); 2.35 (1H, dd,  $J = 8.4, 13.6$  Hz); 2.14 (1H, m); 1.73 (1H, dd,  $J = 7.1, 11.8$  Hz); 1.62 (3H, m); 1.47 (1H, ddd,  $J = 6.3, 9.2, 13.6$  Hz); 12.5 (3H, s); 0.95 (3H, s).  $^{13}\text{C}$  NMR  $\delta$  d 205.4, 129.4, 113.9, 60.7, 55.5, 36.1, 29.3, 23.3, u 157.8, 134.7, 50.5, 44.0, 39.6, 34.1, 30.8. IR: 2924, 1715, 1576, 1446, 1363  $\text{cm}^{-1}$ . HRMS calculated for  $\text{C}_{17}\text{H}_{24}\text{O}_2$  260.1776, found 260.1773.

**Epimerization of Aldehyde 19a.** To aldehyde 19a (2.2 mg, 0.008 mmol) in 50  $\mu\text{L}$  of THF at 0  $^{\circ}\text{C}$  was added KO<sup>t</sup>Bu (1.9mg, 0.017 mmol) in one portion. The reaction mixture was stirred at 0  $^{\circ}\text{C}$  for 1h and room temperature for 1 h. The reaction mixture was then partitioned between MTBE and 0.5 N aqueous HCl. The organic layer was washed sequentially, with brine, dried ( $\text{Na}_2\text{SO}_4$ ) and concentrated. The residue was chromatographed to give 2.0 mg of a mixture of 19a and 19b. TLC  $R_f = 0.39$  for 19a and 0.29 for 19b (10% MTBE/ PE).

To 2.0 mg of the mixture of 19a and 19b in 30  $\mu\text{L}$  of THF at 0  $^{\circ}\text{C}$  was added  $\text{LiAlH}_4$  (1.2 mg, 0.017 mmol). The mixture was stirred from 0  $^{\circ}\text{C}$  to 5  $^{\circ}\text{C}$  over 40 minutes. Then, the reaction mixture was partitioned between MTBE and, sequentially, 0.5 N aqueous HCl and brine. The organic extract was dried ( $\text{Na}_2\text{SO}_4$ ) and concentrated. The residue was chromatographed to give 1.7 mg (77% yield for 2 steps) of a mixture of 16a and 16b, TLC  $R_f = 0.31$  (30% MTBE/ PE).

#### References:

1. a) Still, W. C.; Kahn, M.; Mitra, A. *J. Org. Chem.* **1978**, *43*, 2923. b) Taber, D. F. *J. Org. Chem.* **1982**, *47*, 1351.
2. Blanchard, P.; Da Silva, A. D.; El Kortbi, M. S.; Fourrey, J-L.; Robert-Gero, M. *J. Org. Chem.* **1993**, *58*, 6517.

3. a) Taber, D. F.; Ruckle, R. E. Jr.; Hennessy, M. *J. Org. Chem.* **1986**, *51*, 4077. b) Danheiser, R. L.; Miller, R. F.; Brisbois, R. G.; Park, S. Z. *J. Org. Chem.* **1990**, *55*, 1959. c) Taber, D. F.; You, K.; Song, Y. *J. Org. Chem.* **1995**, *60*, 1093. d) Taber, D. F.; Green, J. H.; Zhang, W.; Song, R. *J. Org. Chem.* **2000**, *65*, 5436.
4. a) Dess, D. B.; Martin, J. C. *J. Am. Chem. Soc.* **1991**, *113*, 7277. b) Ireland, R. E.; Liu, L. *J. Org. Chem.* **1993**, *58*, 2899.

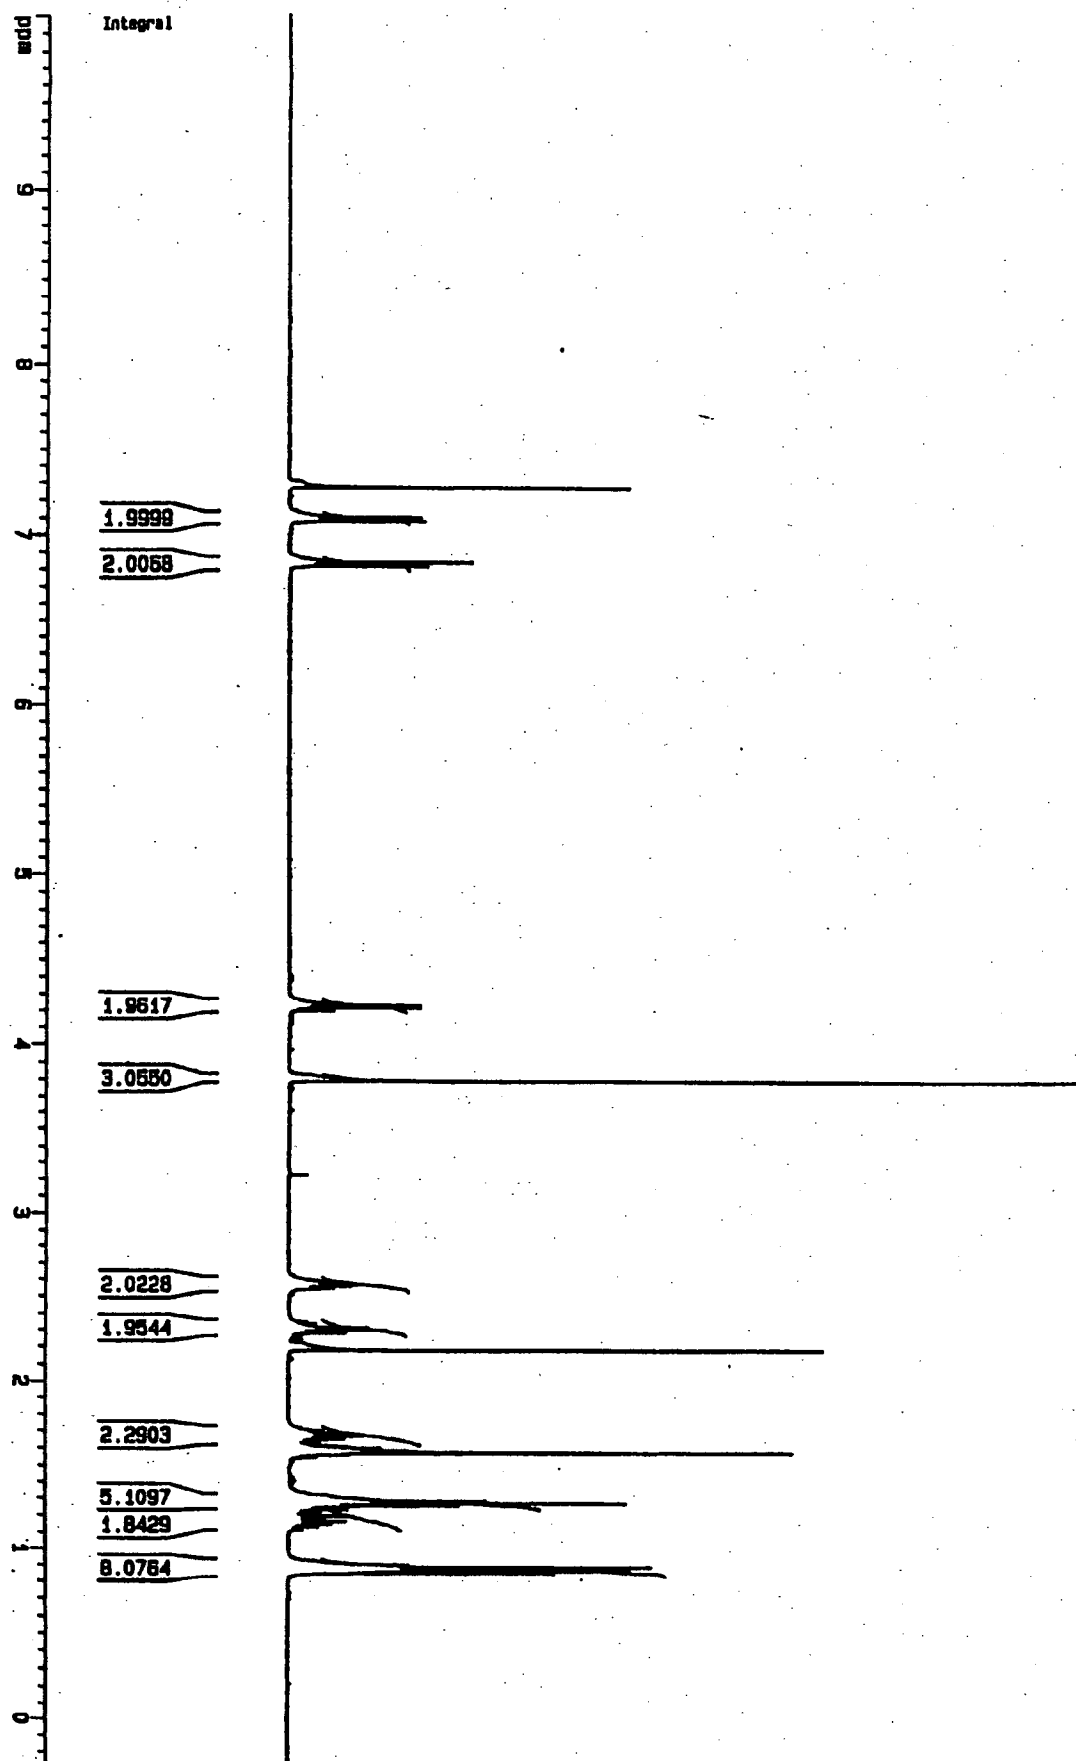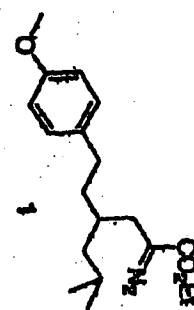

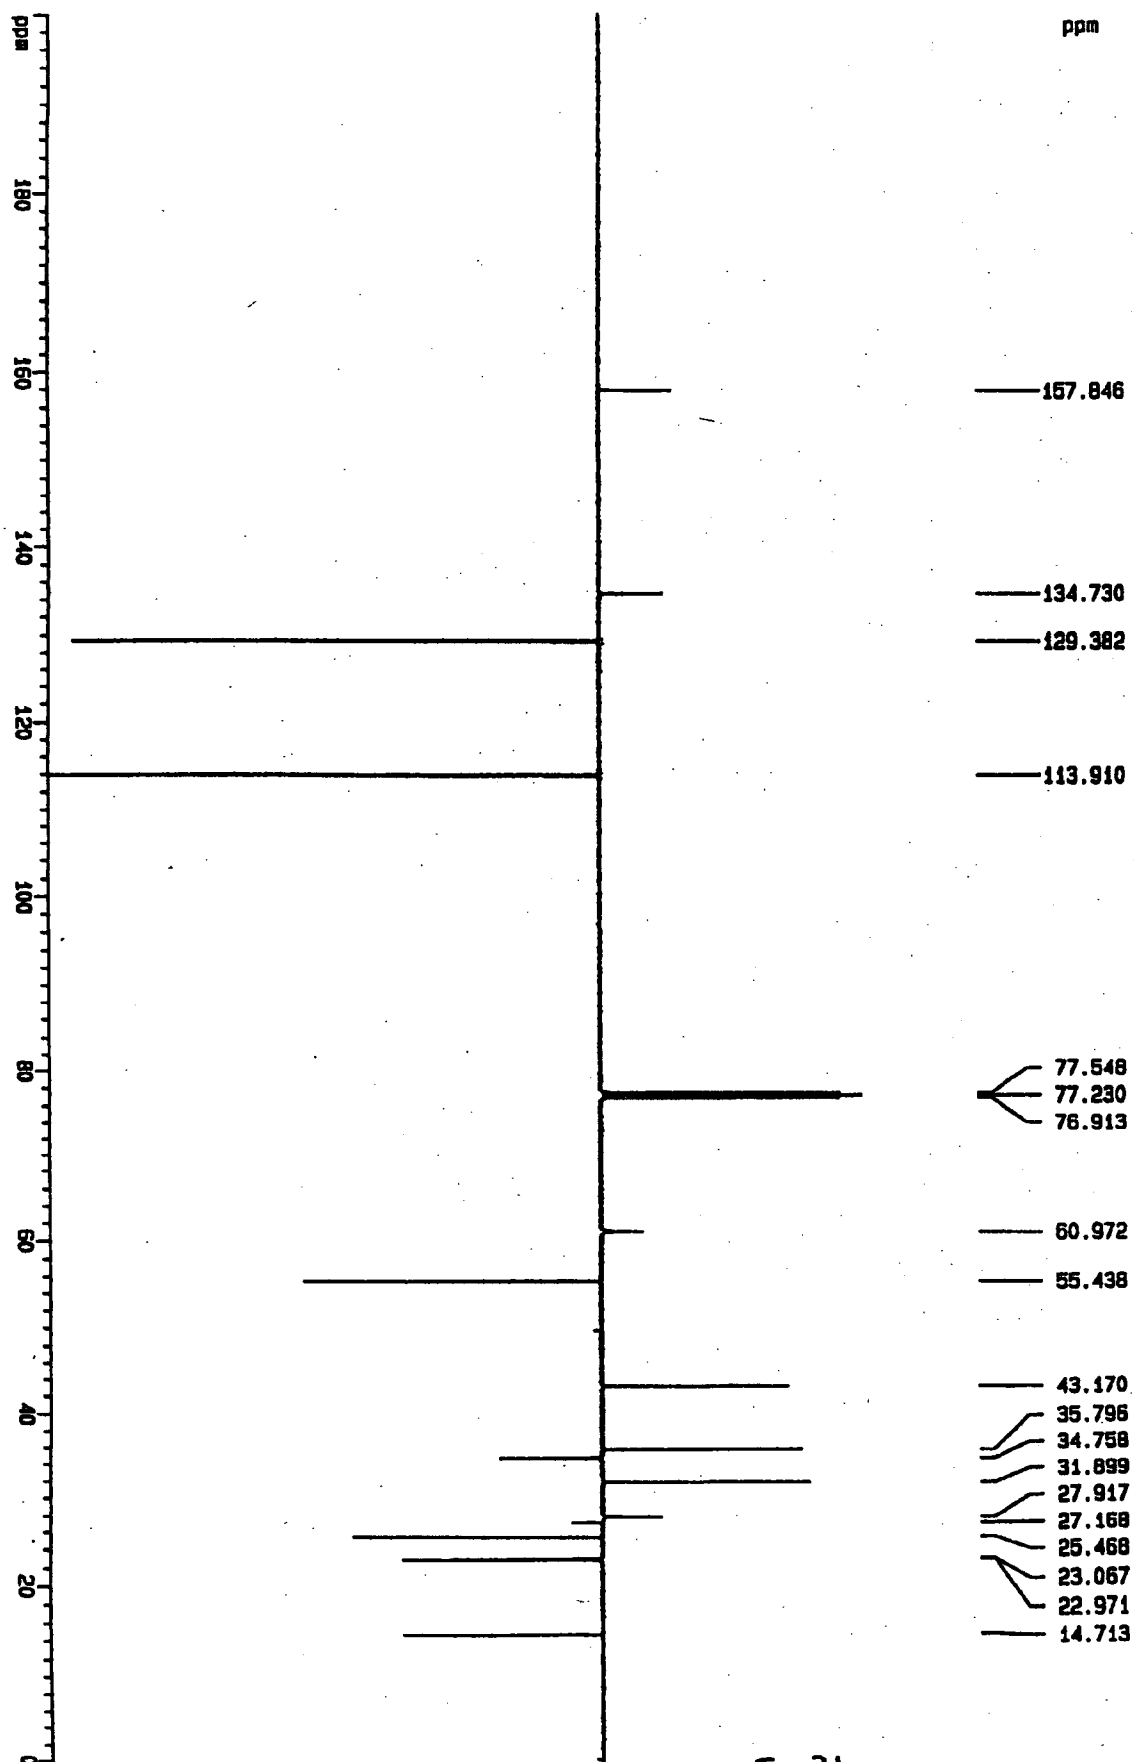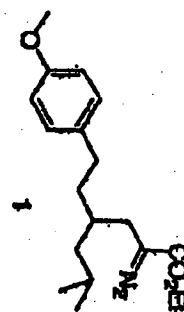

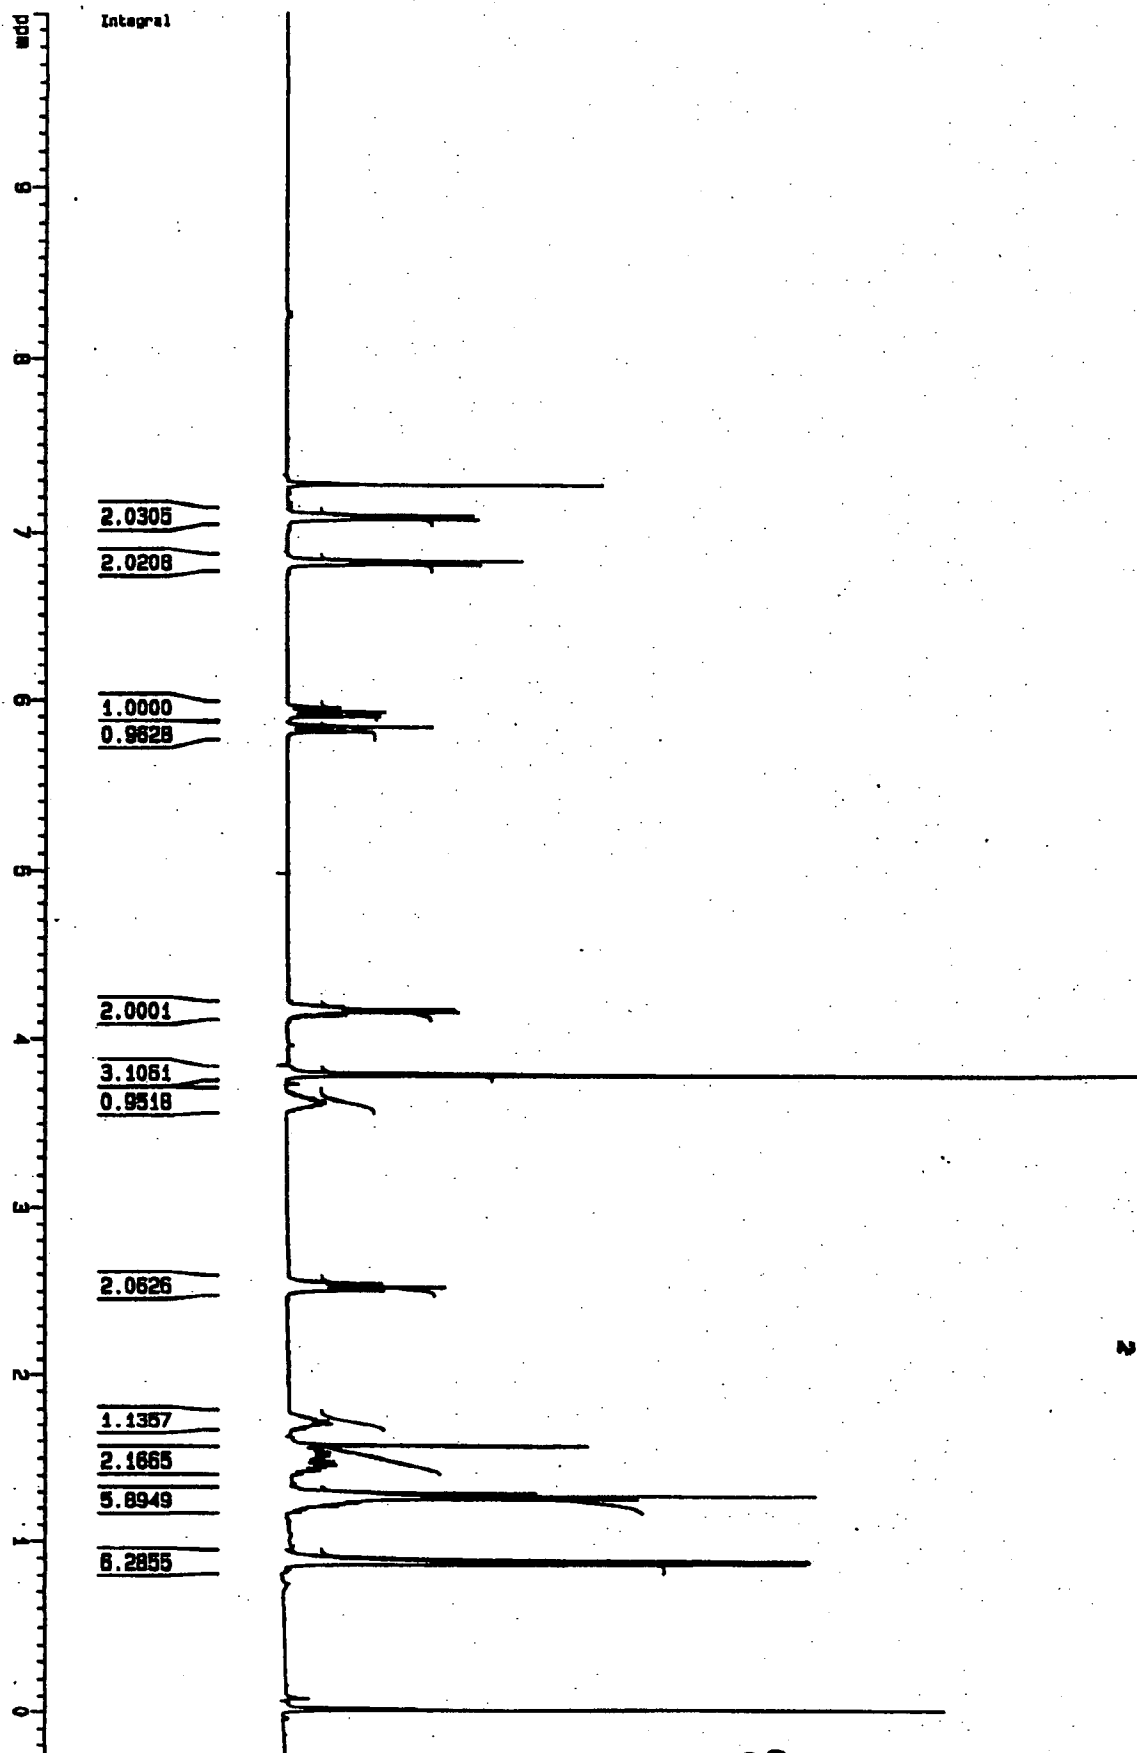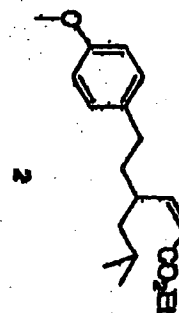

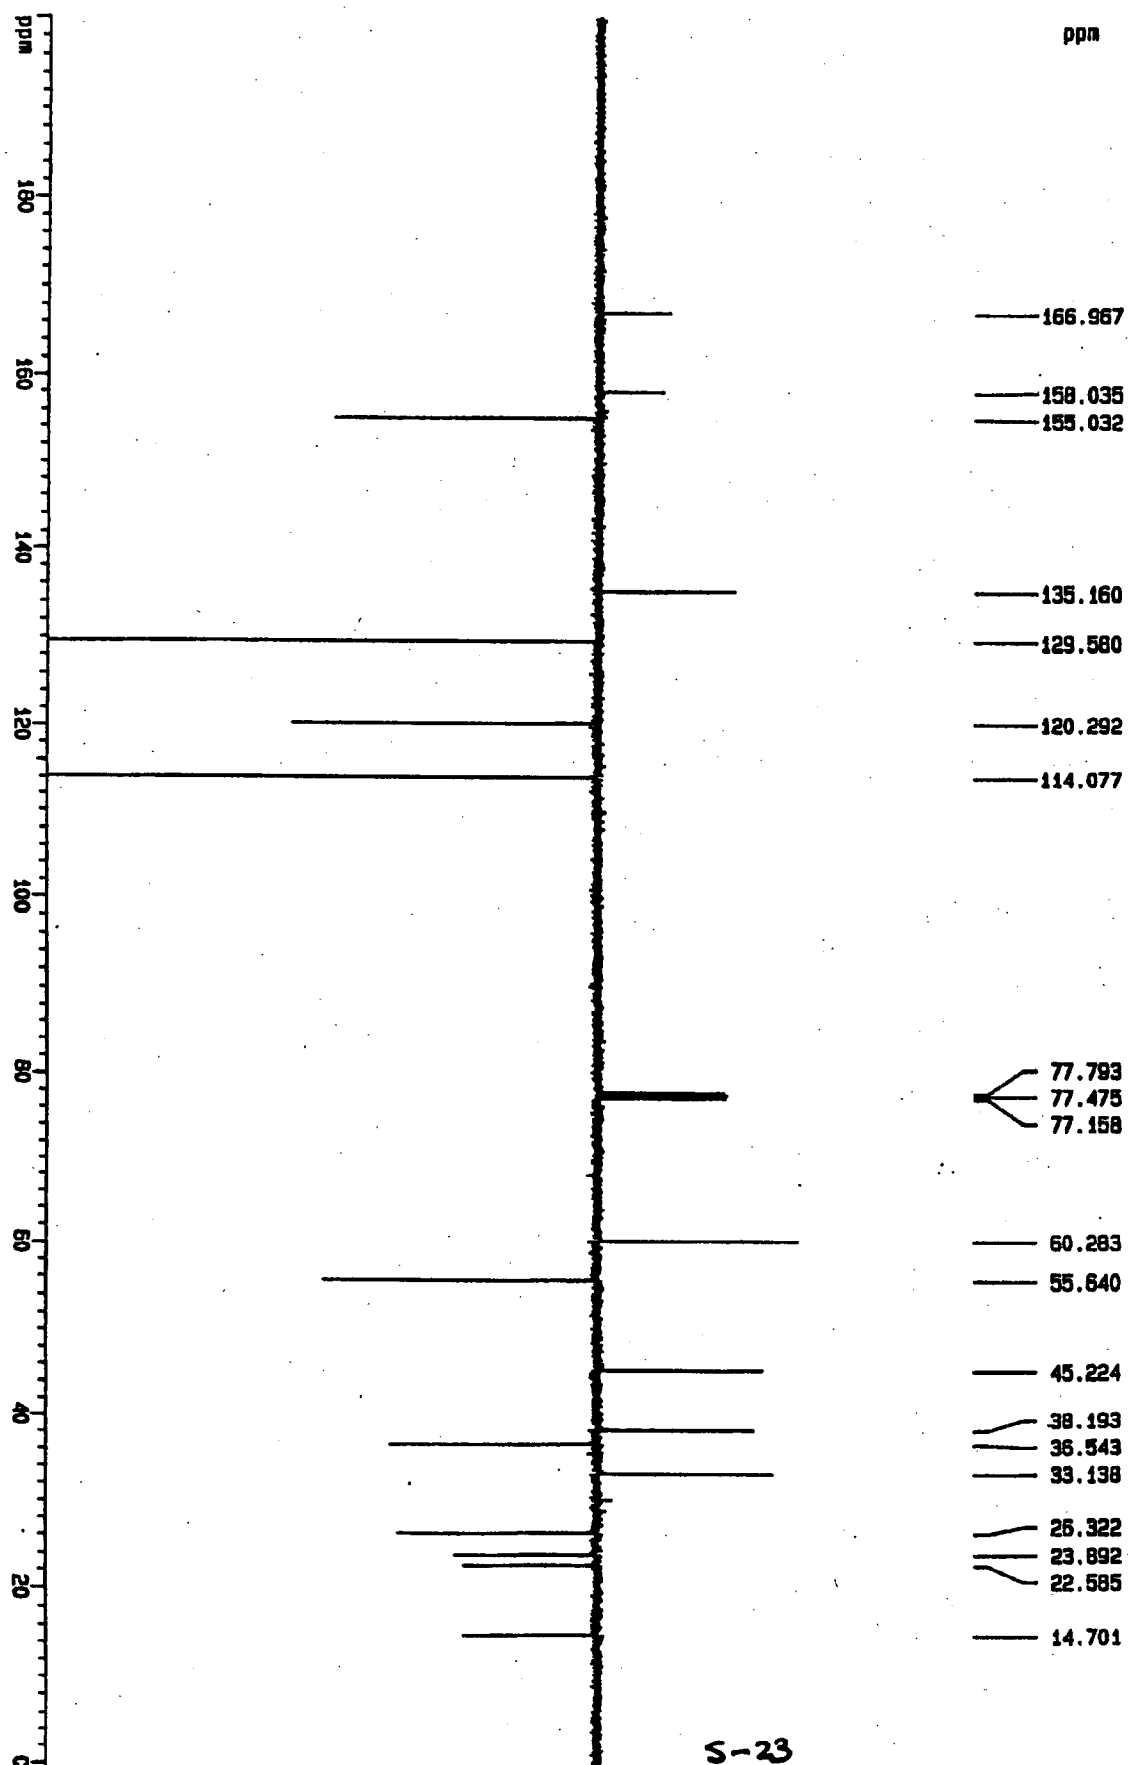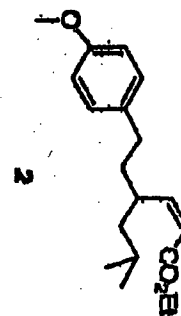

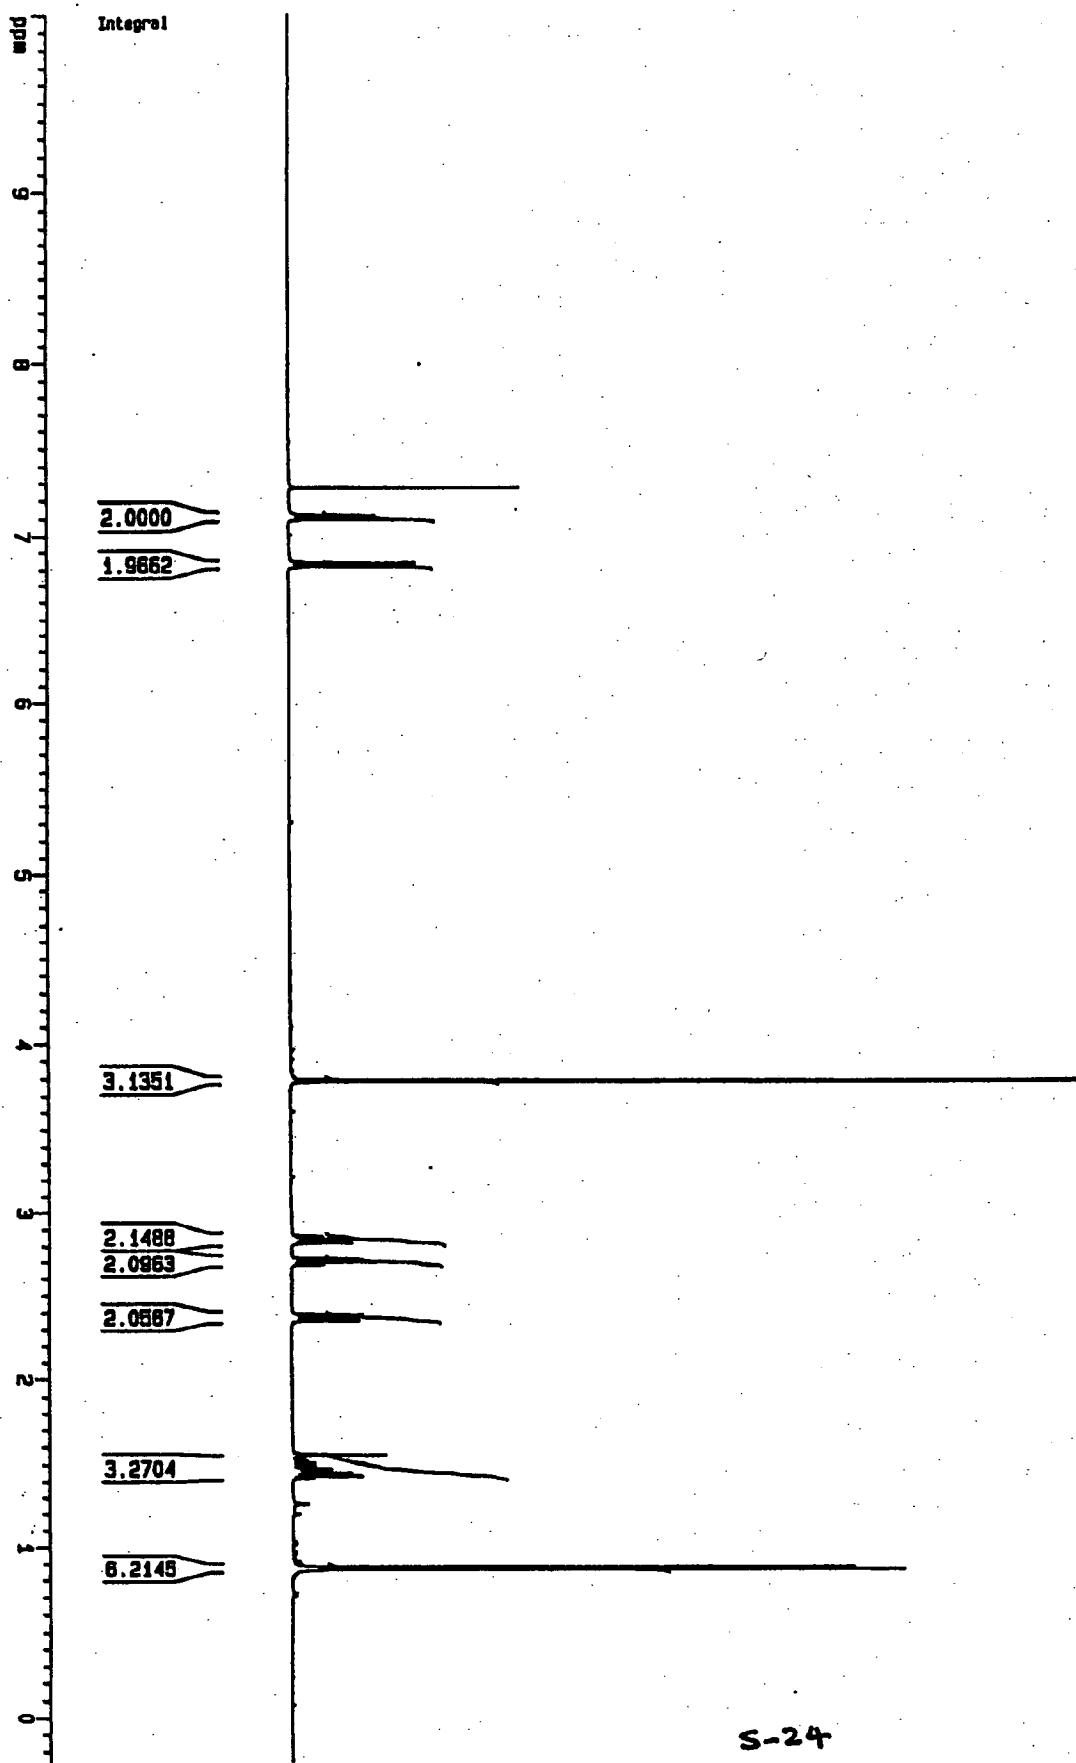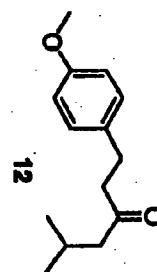



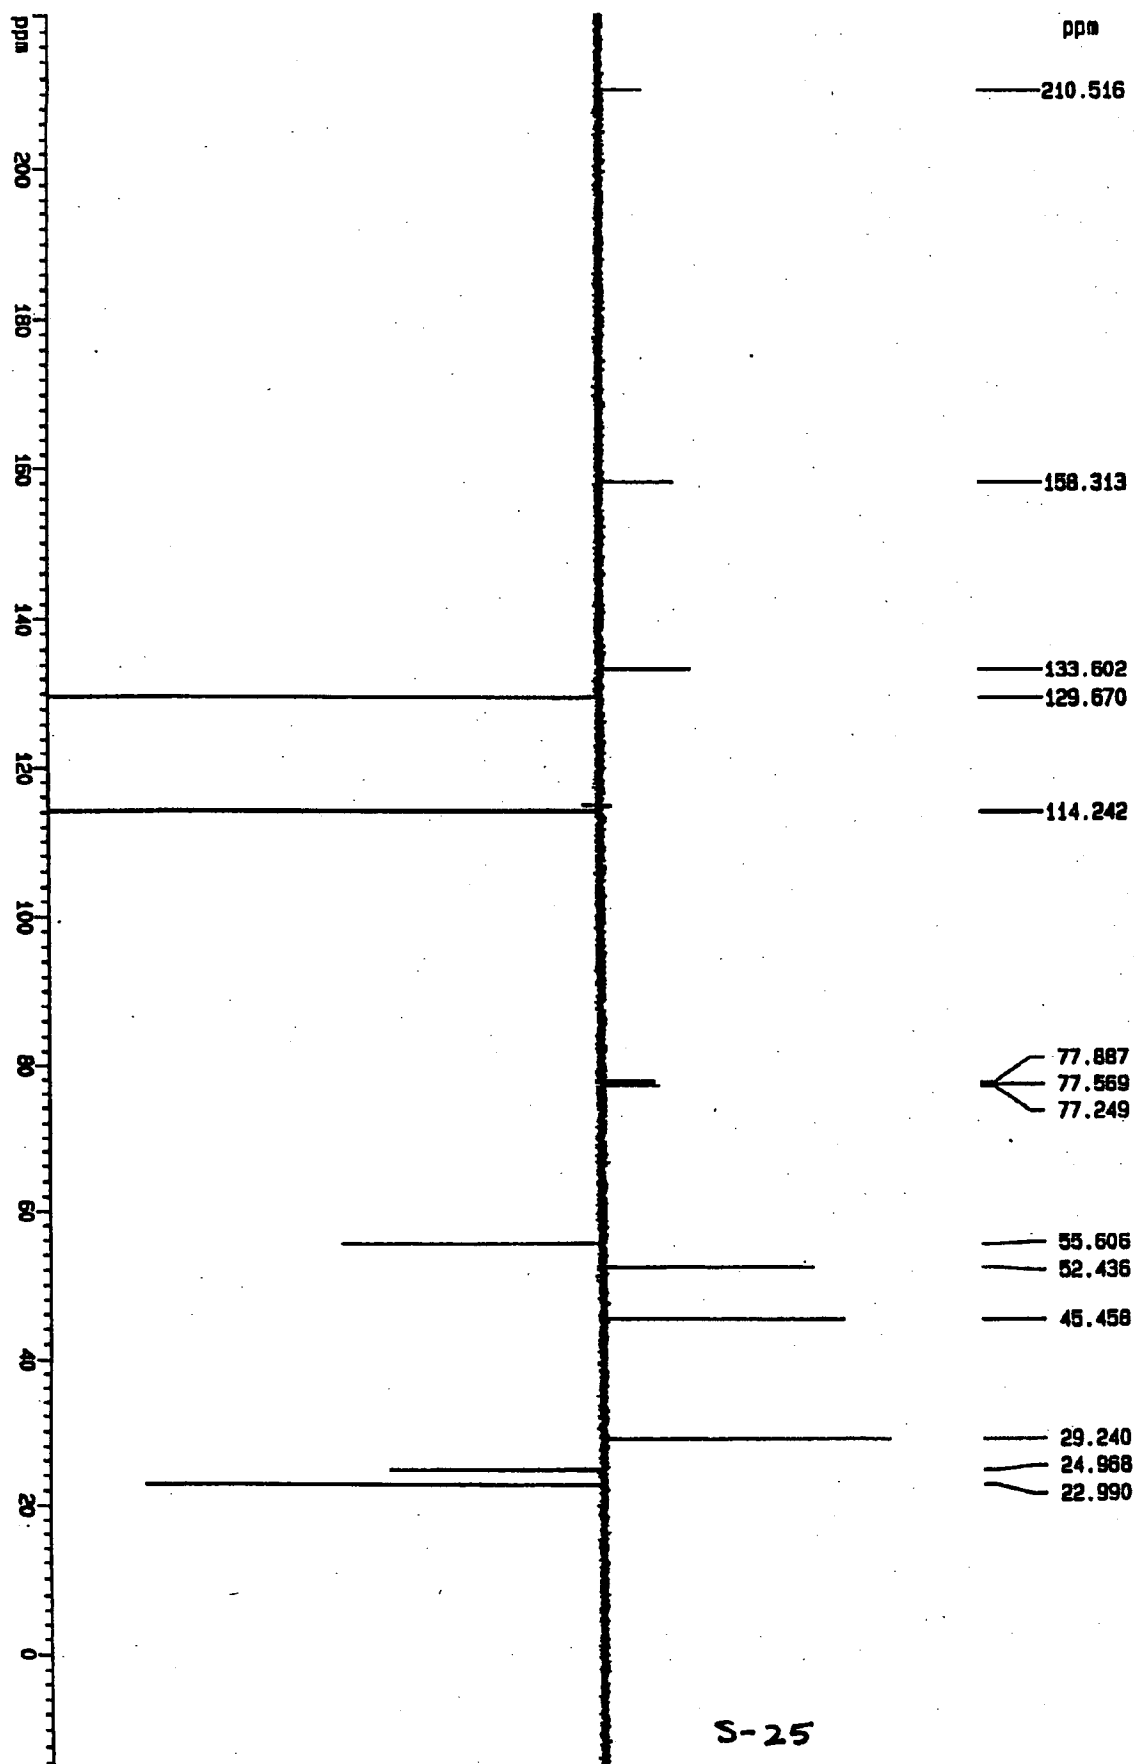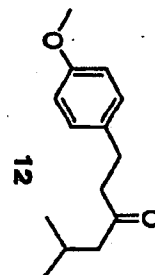

S-25

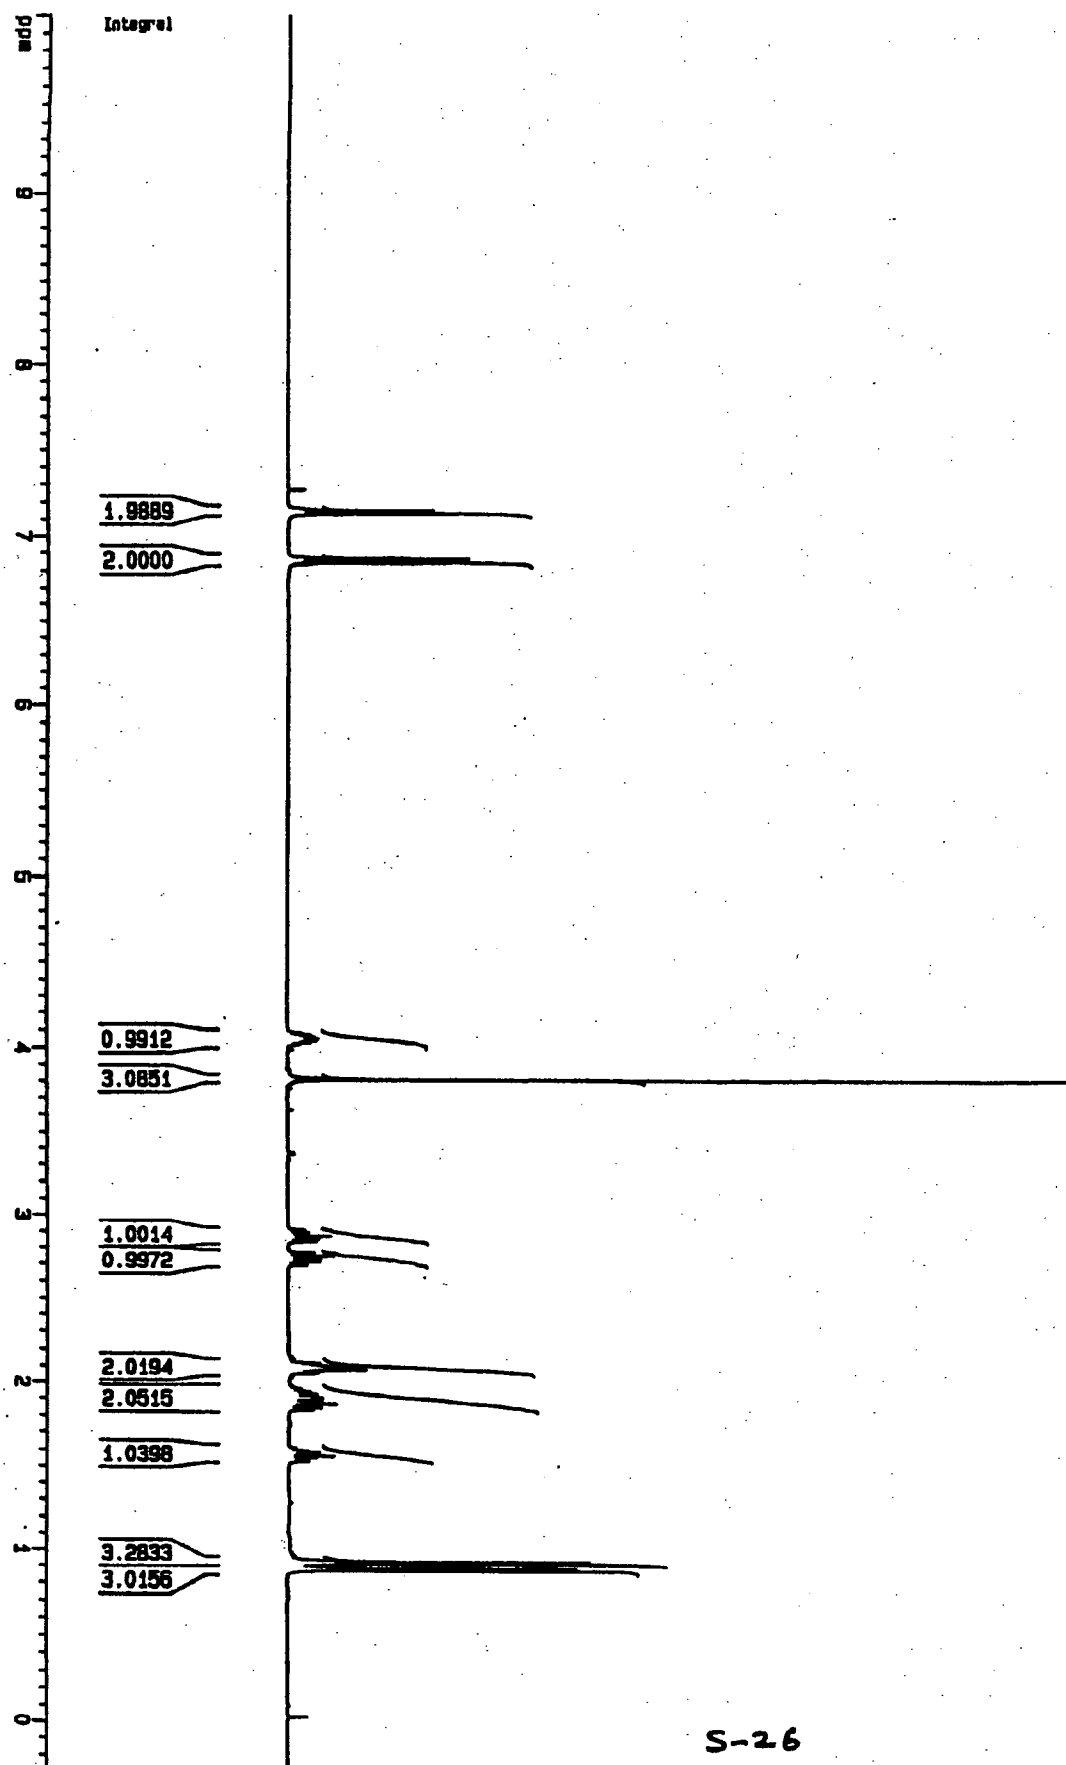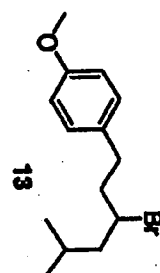

S-26

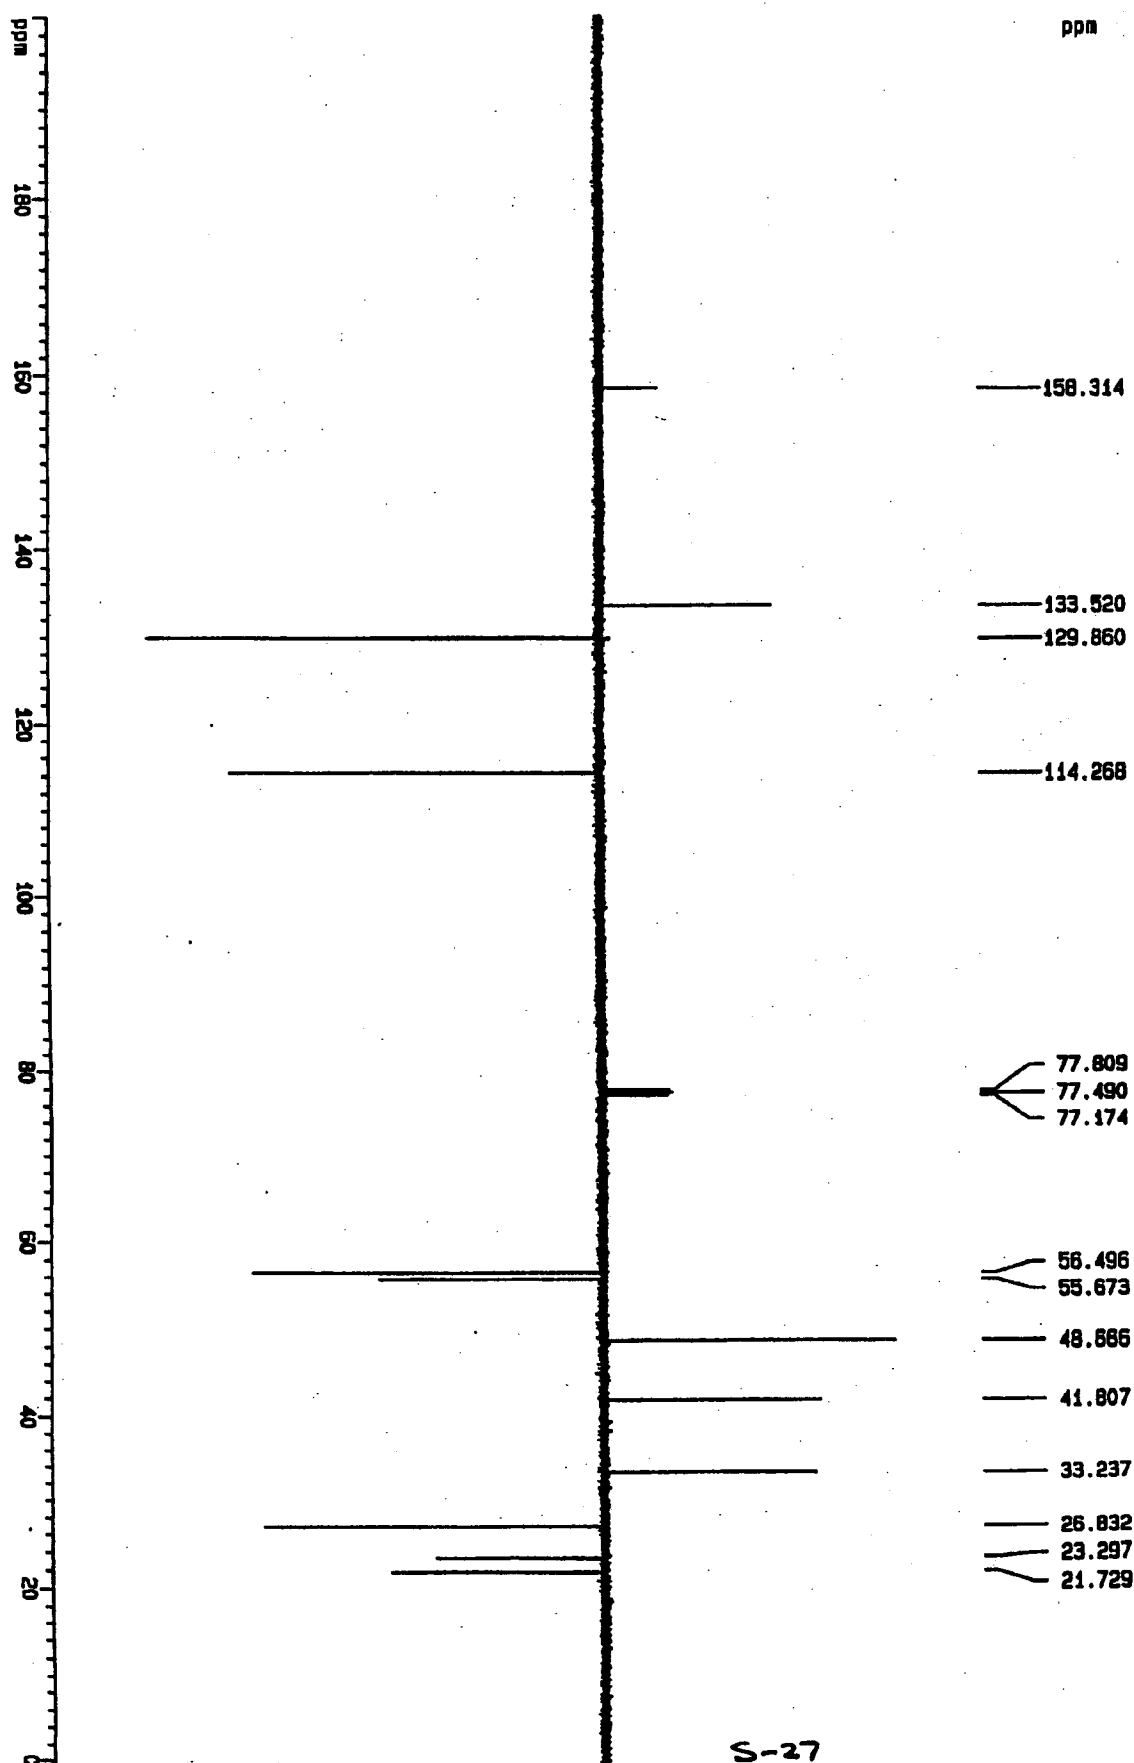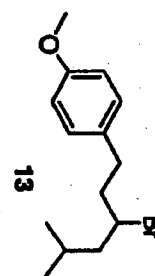

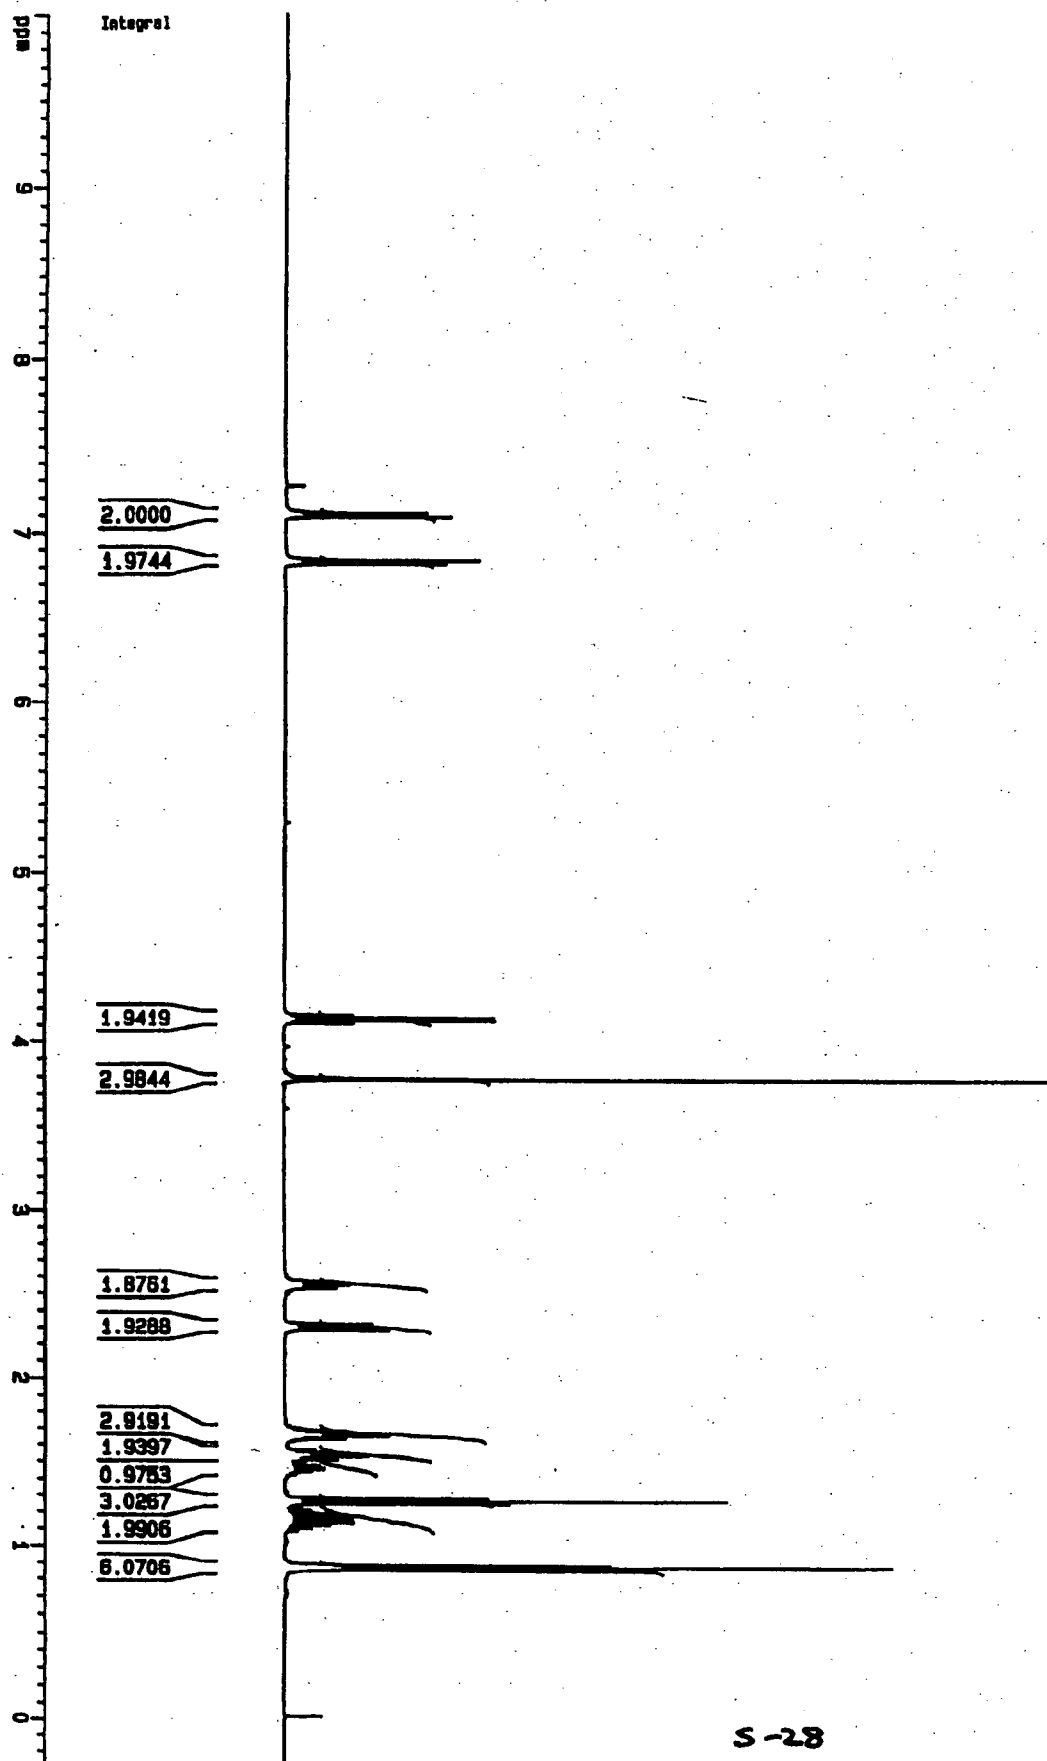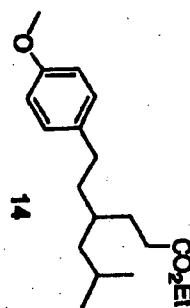

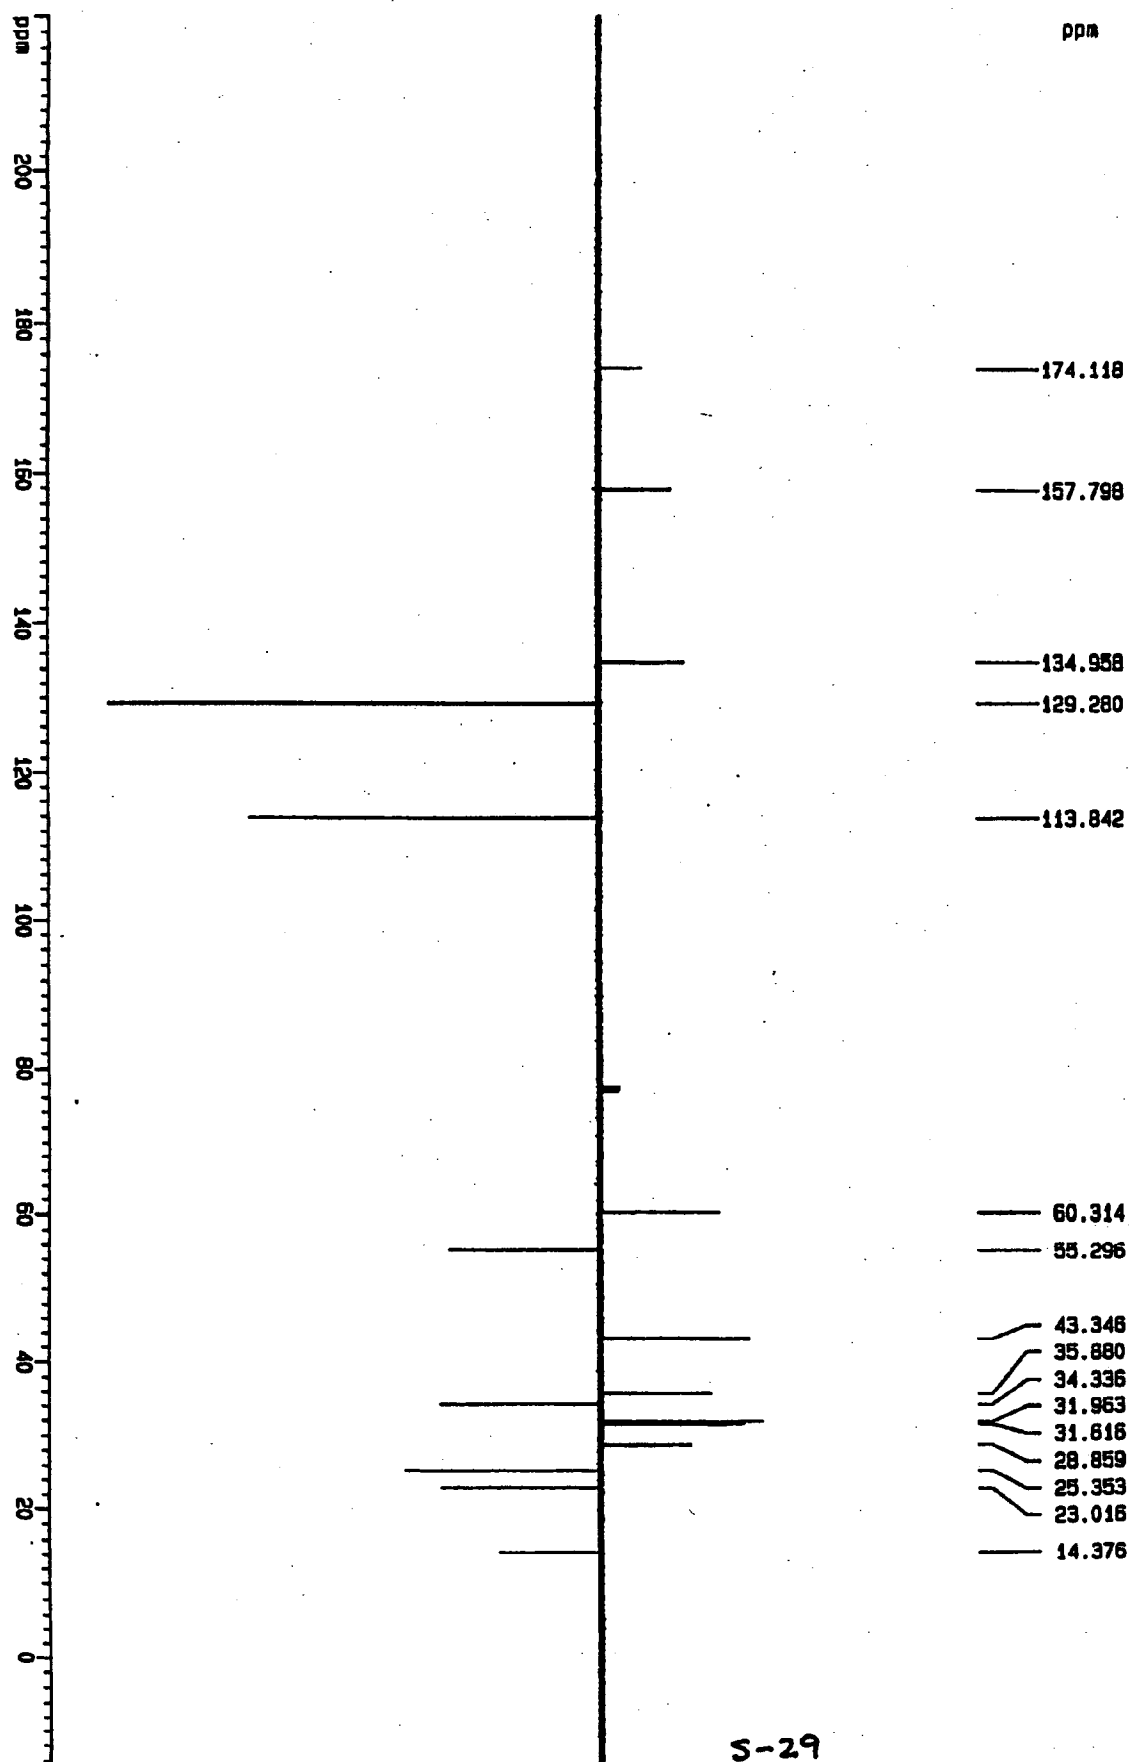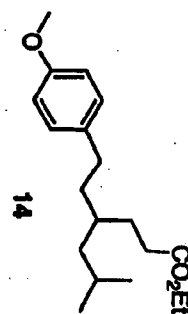

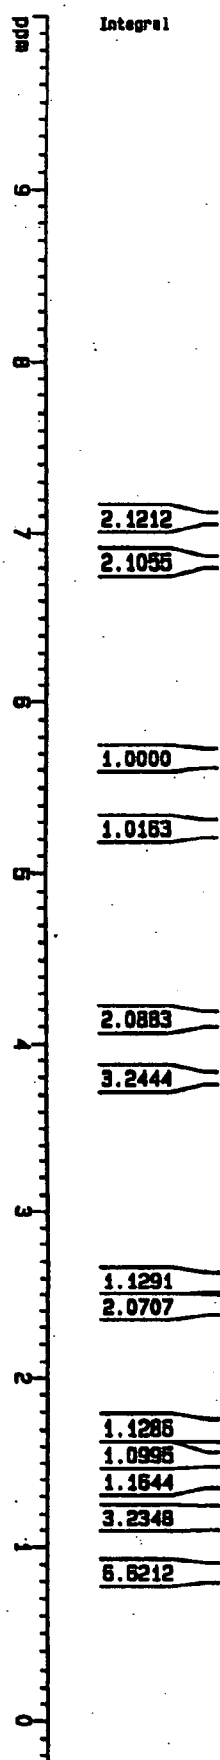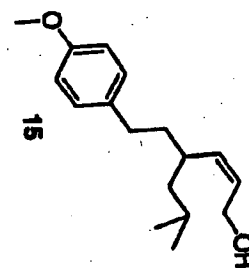

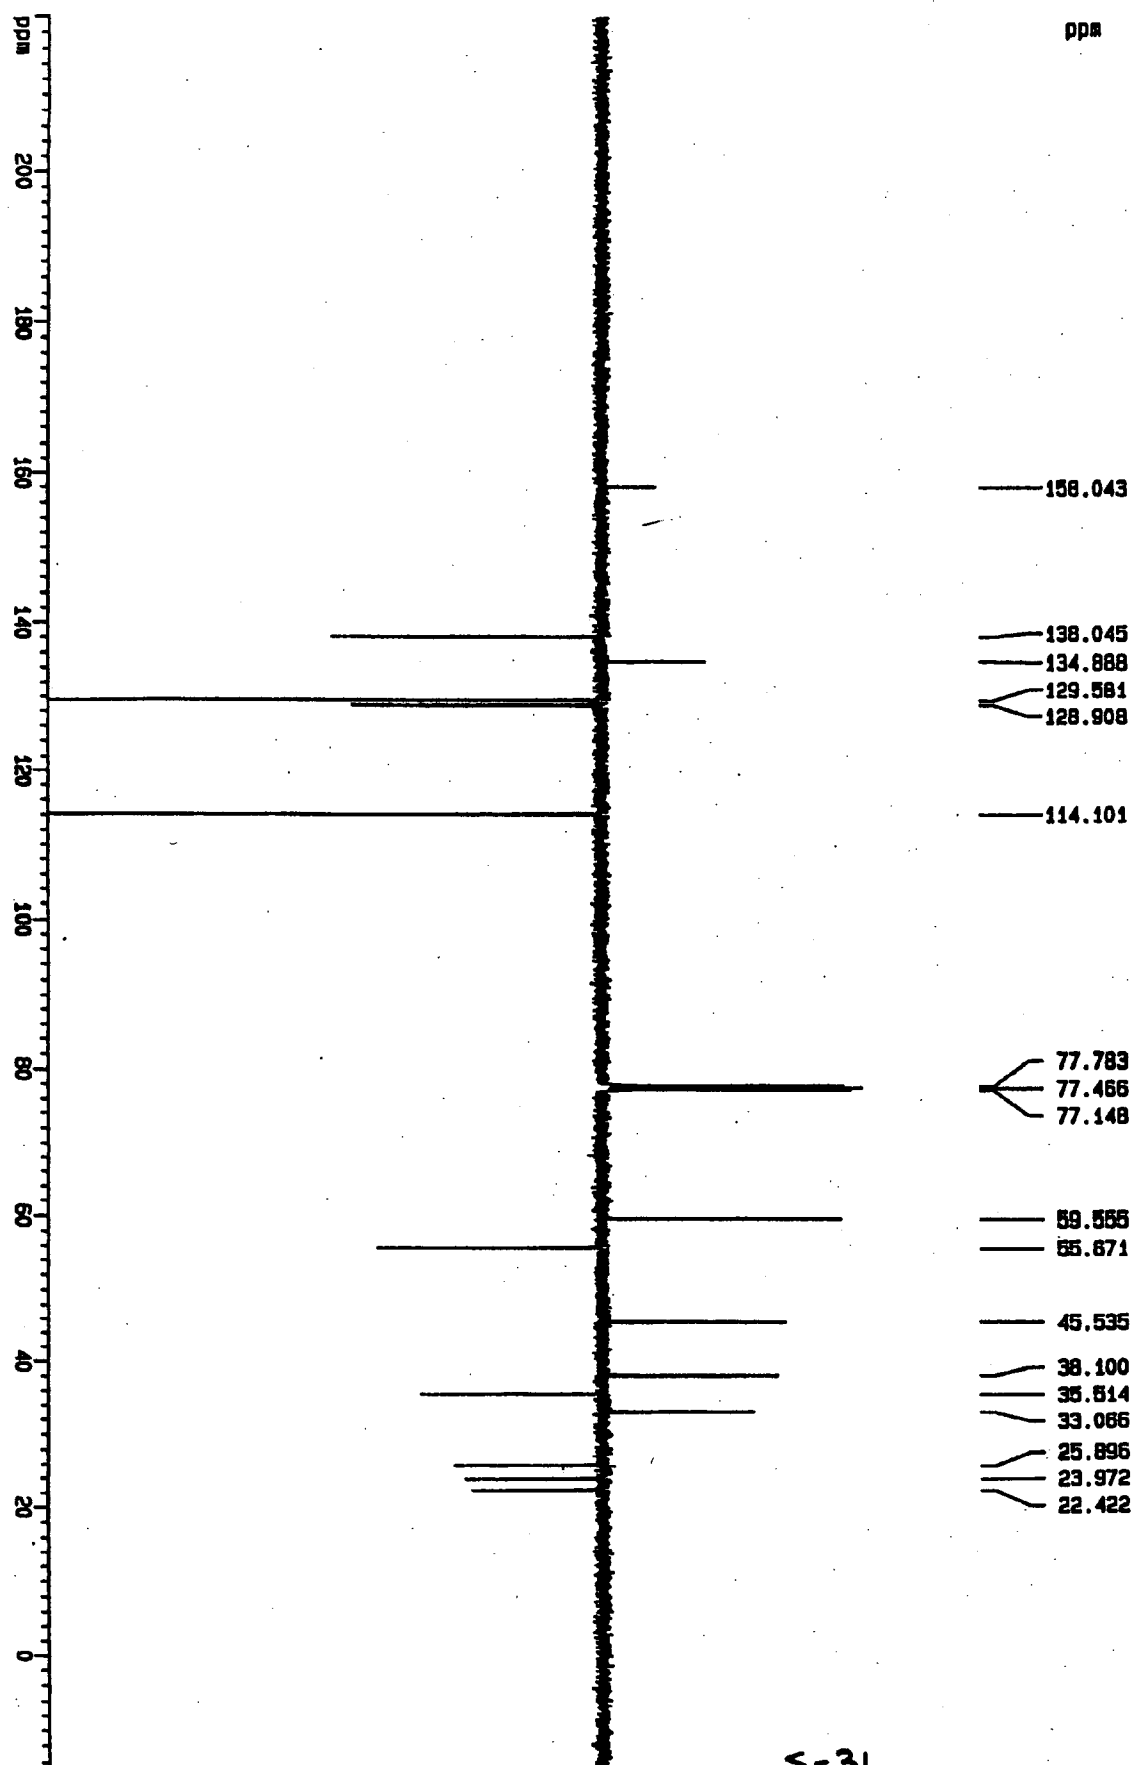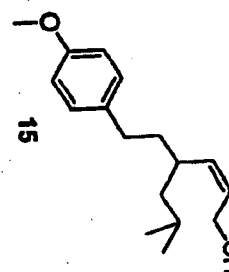

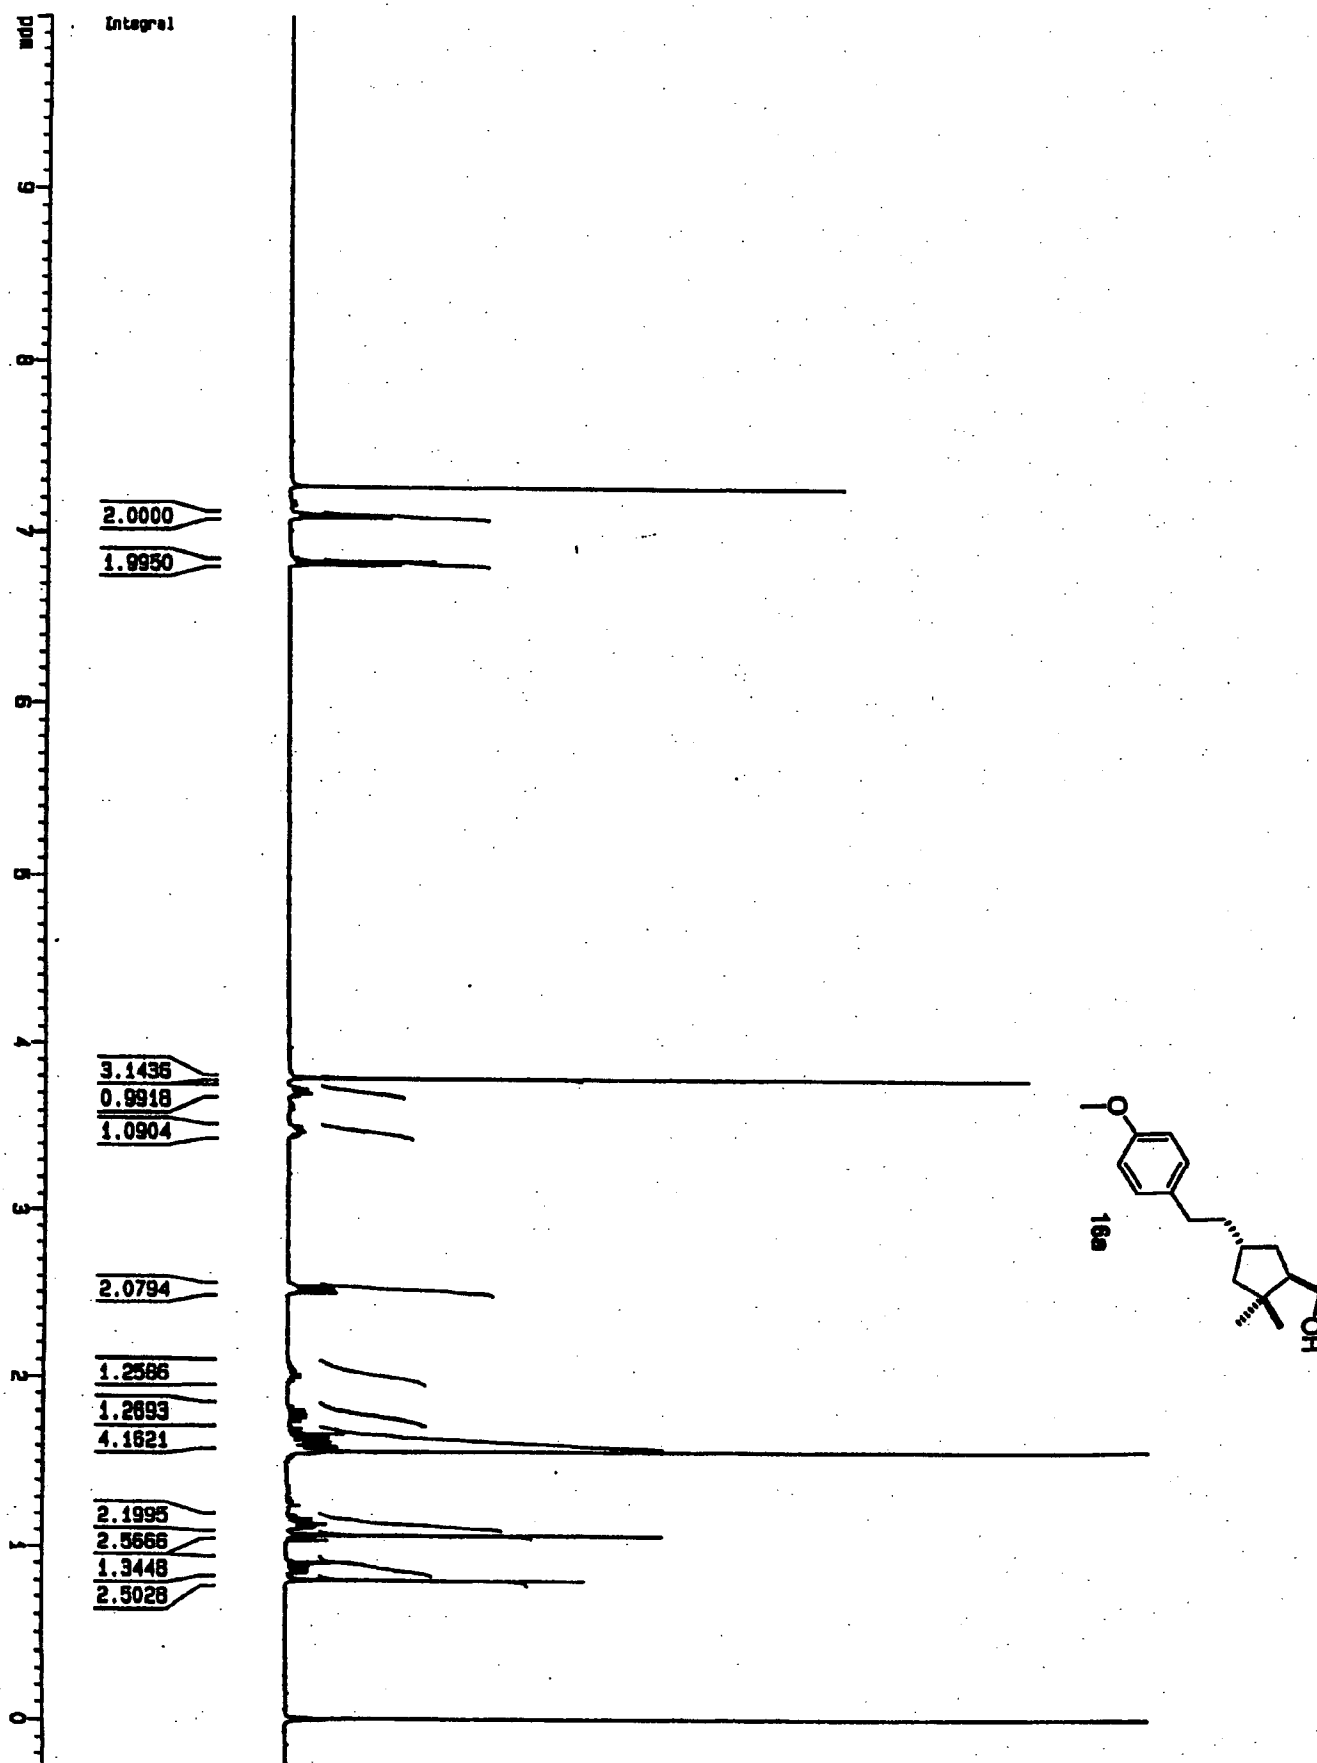



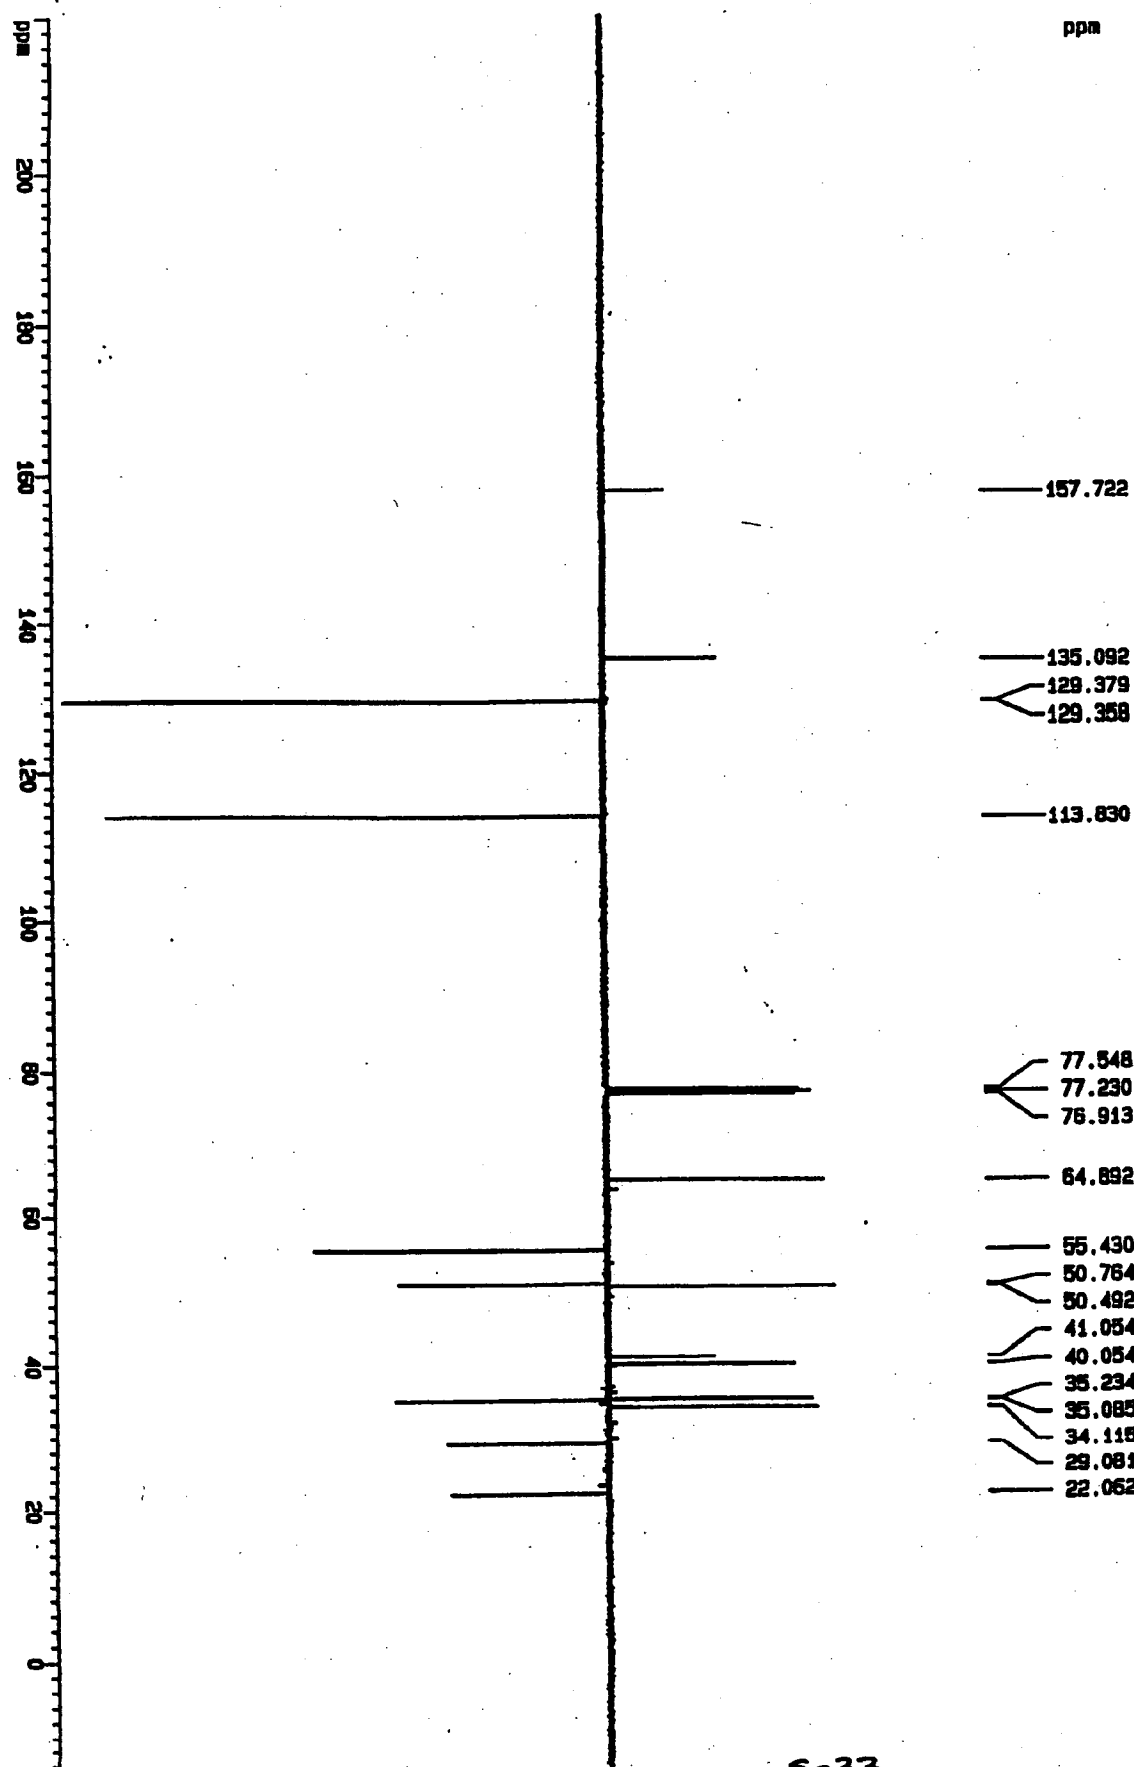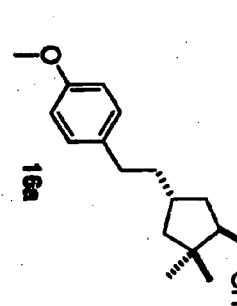

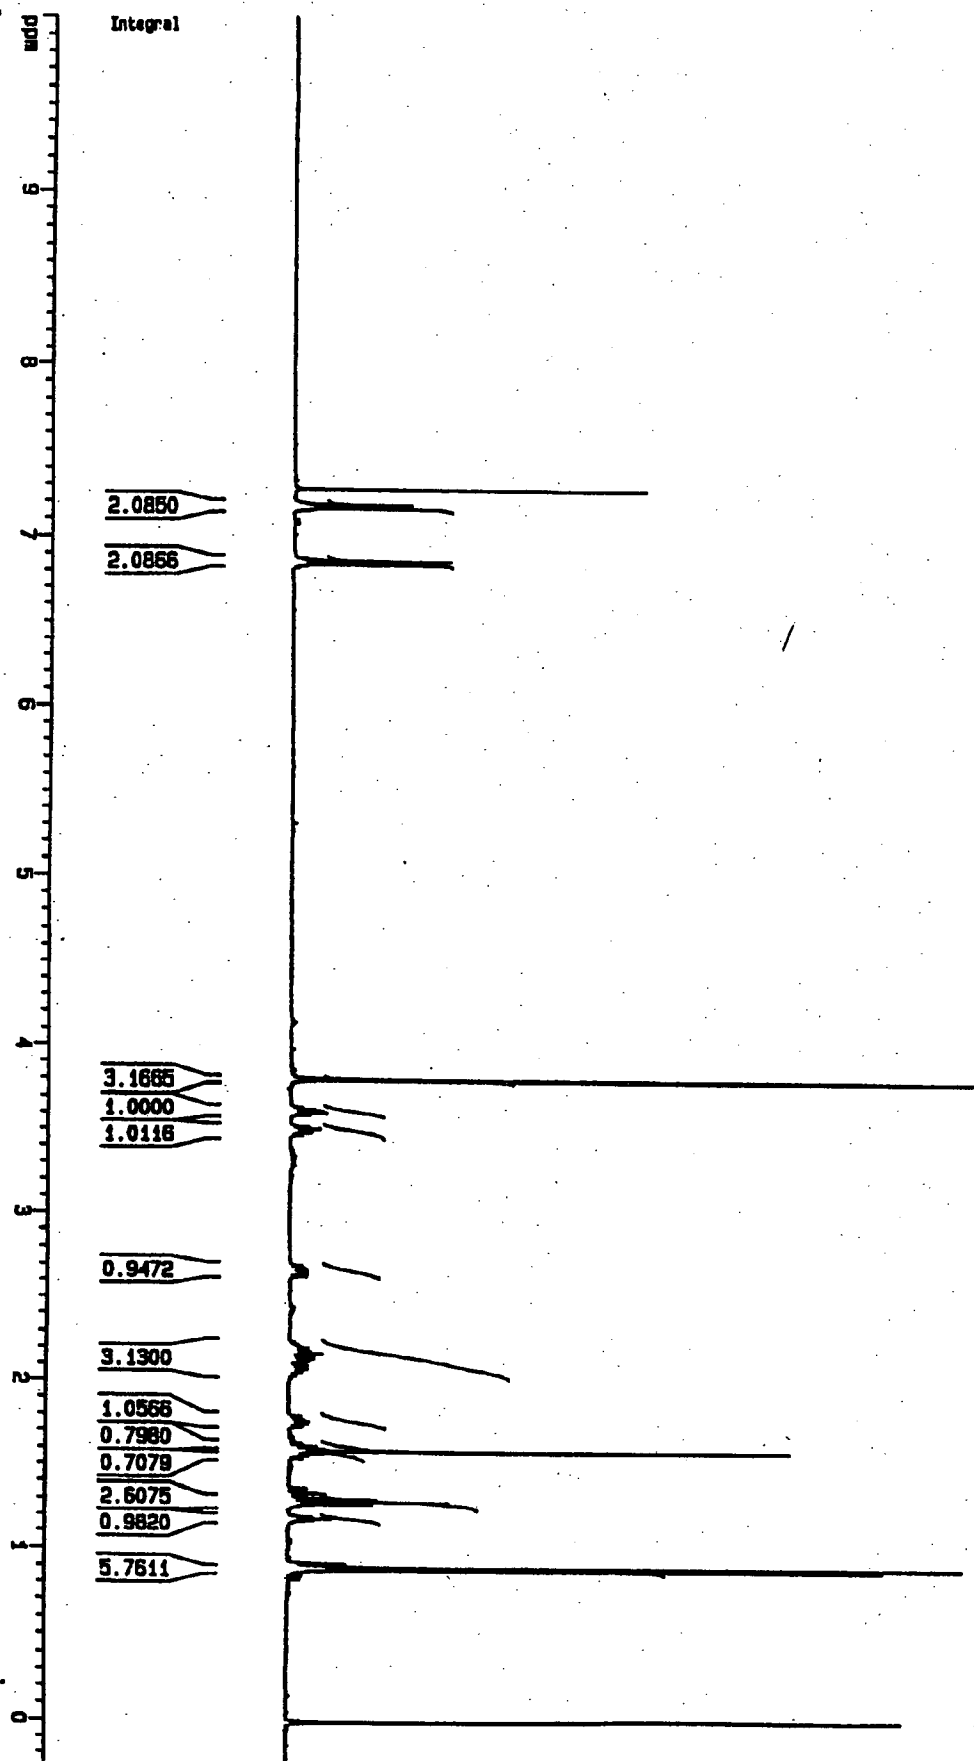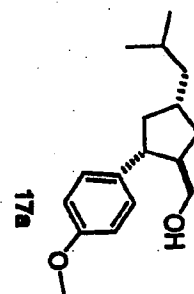

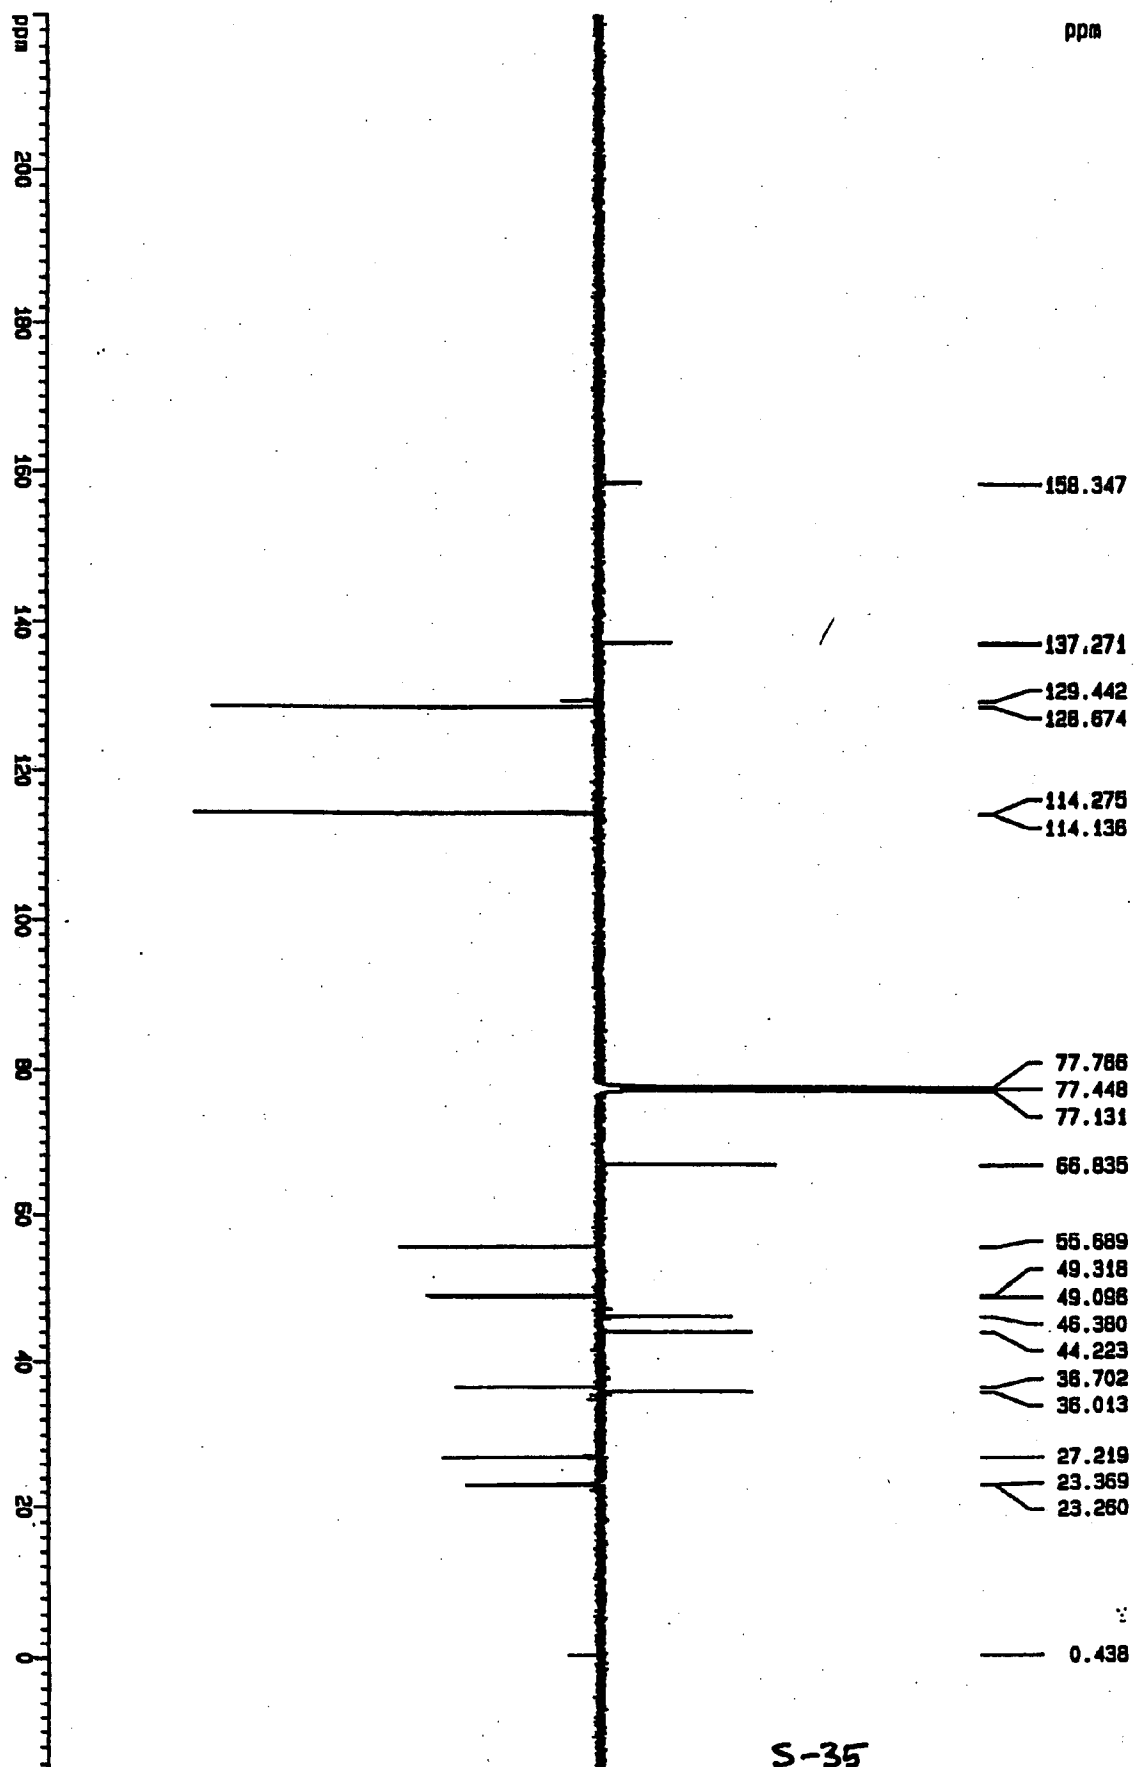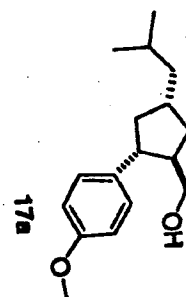

S-35

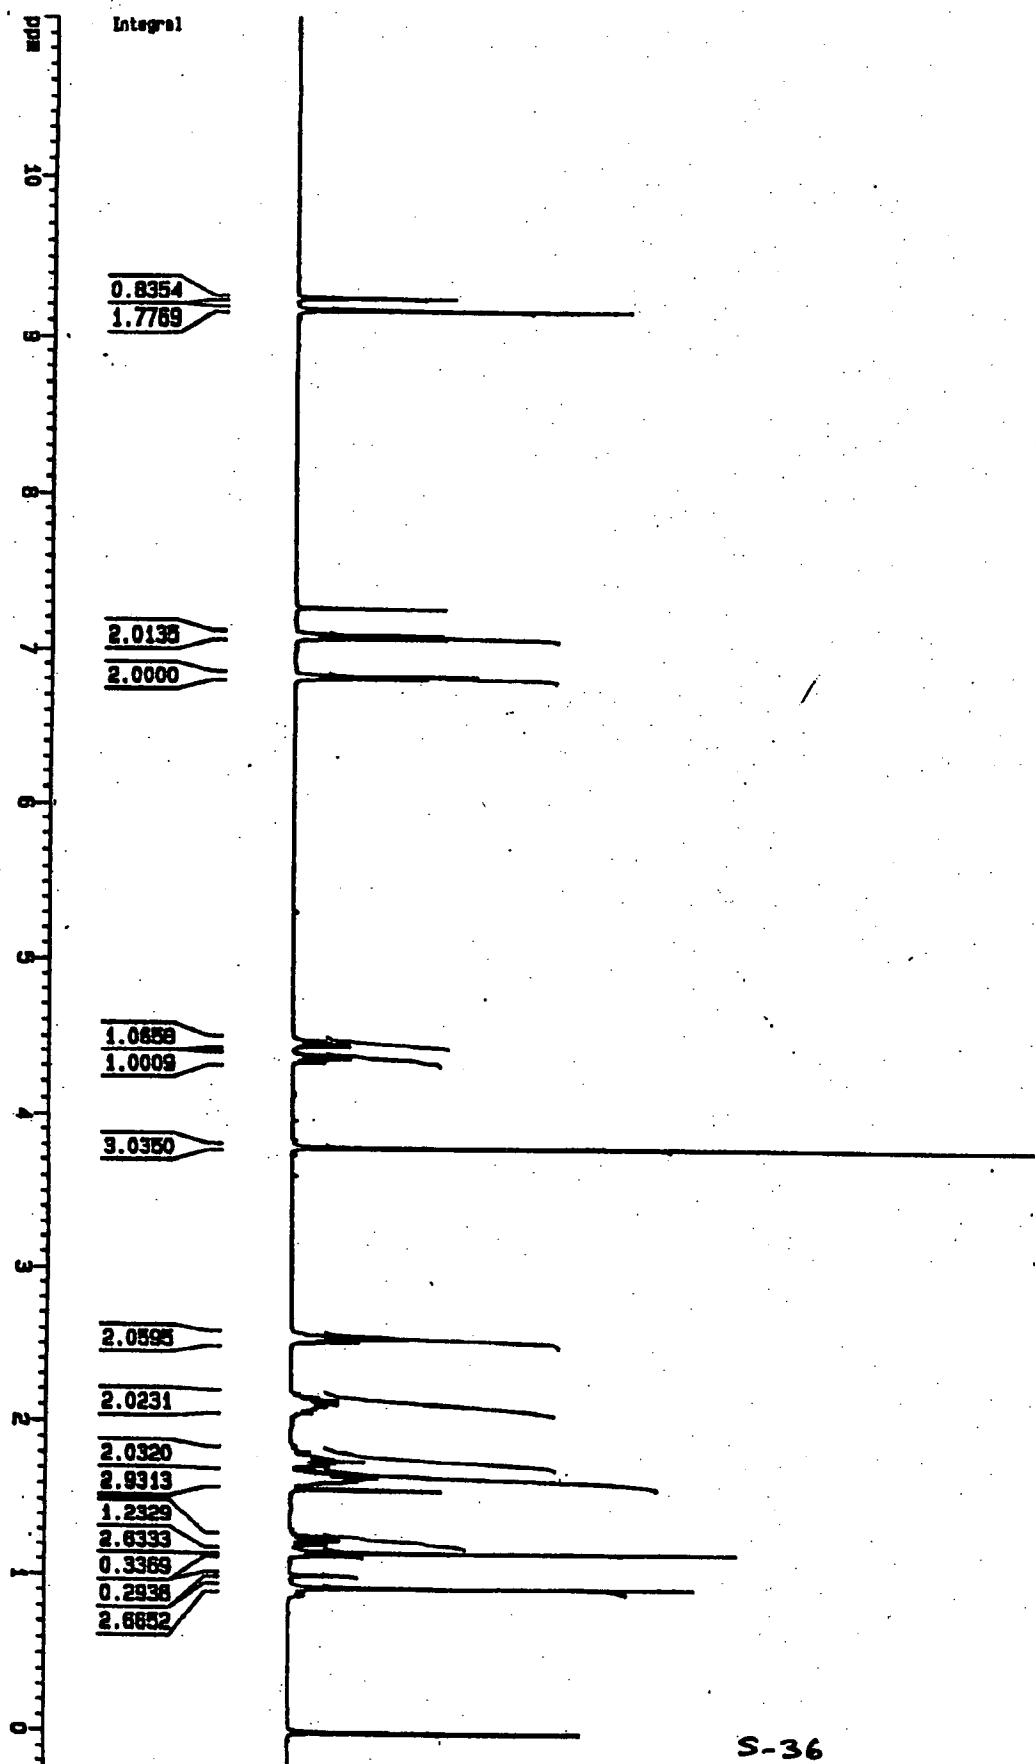

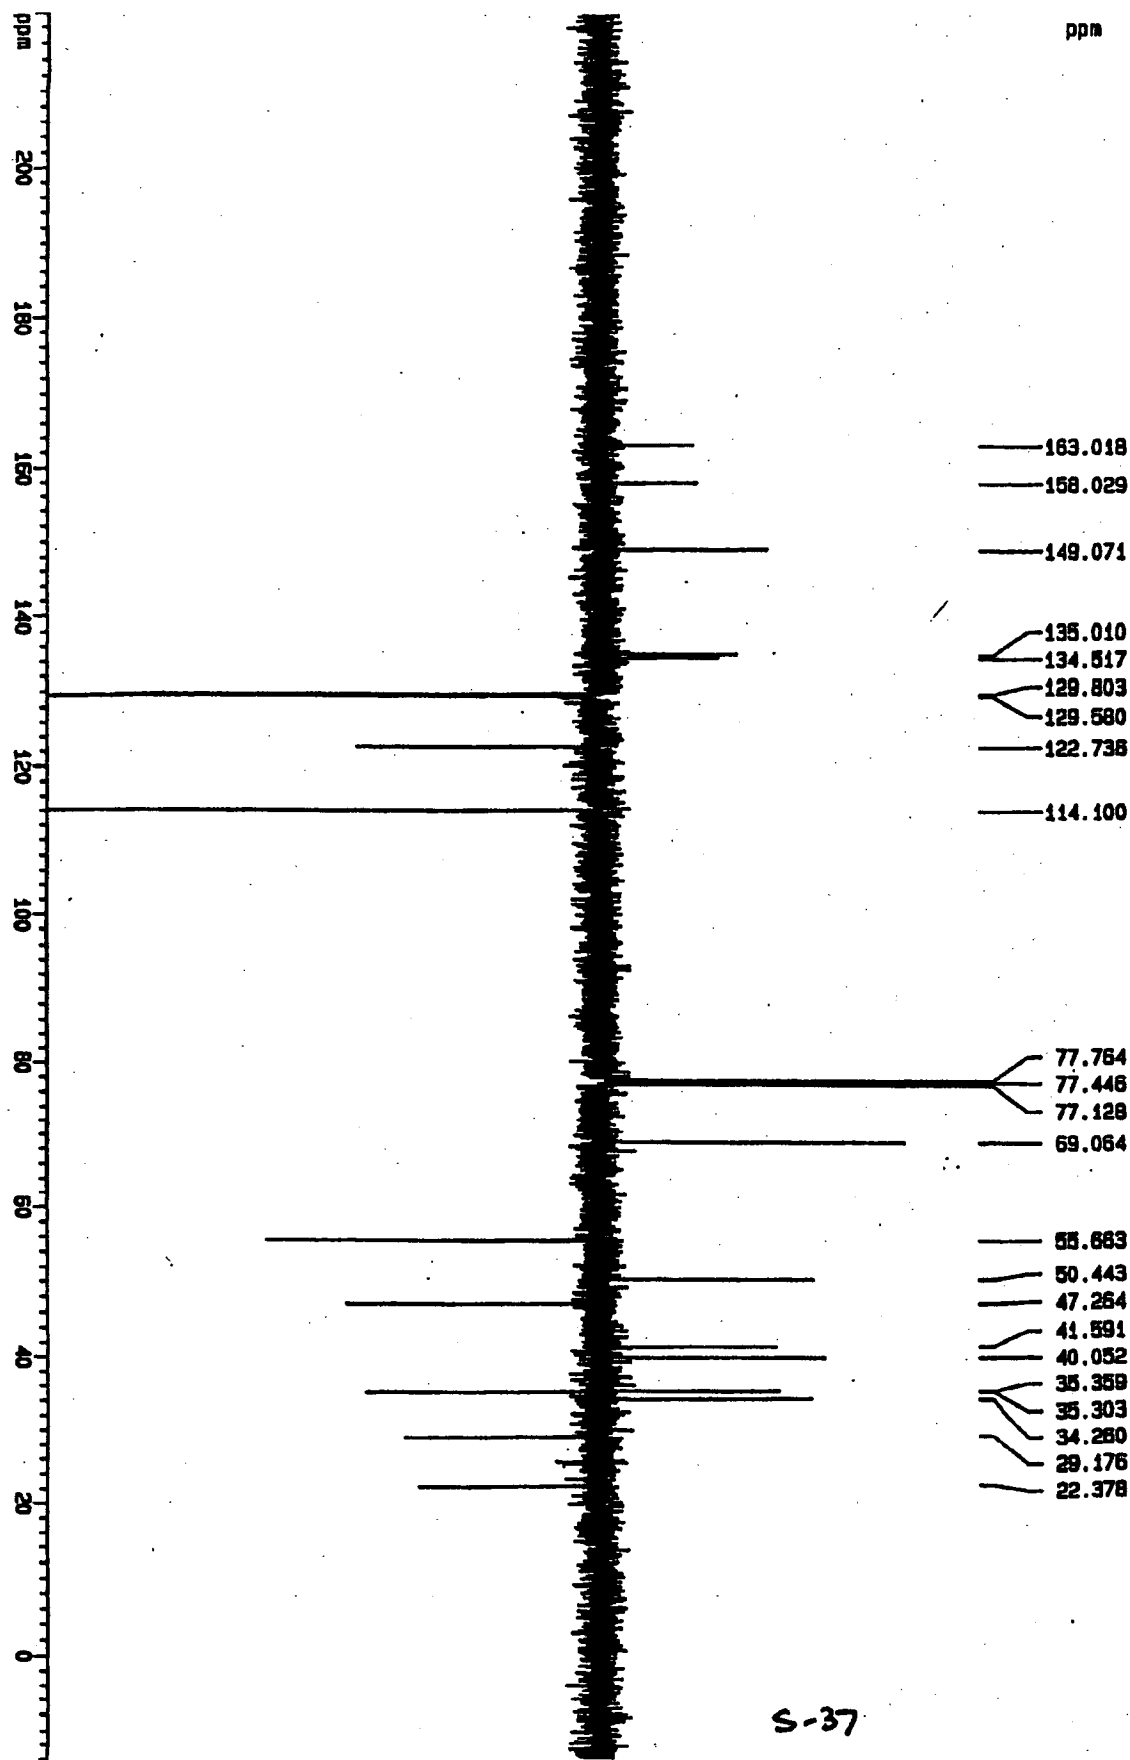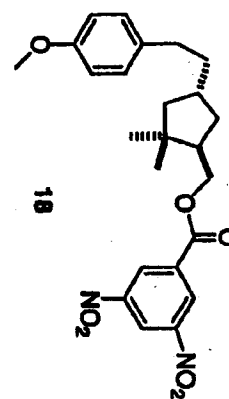

S-37

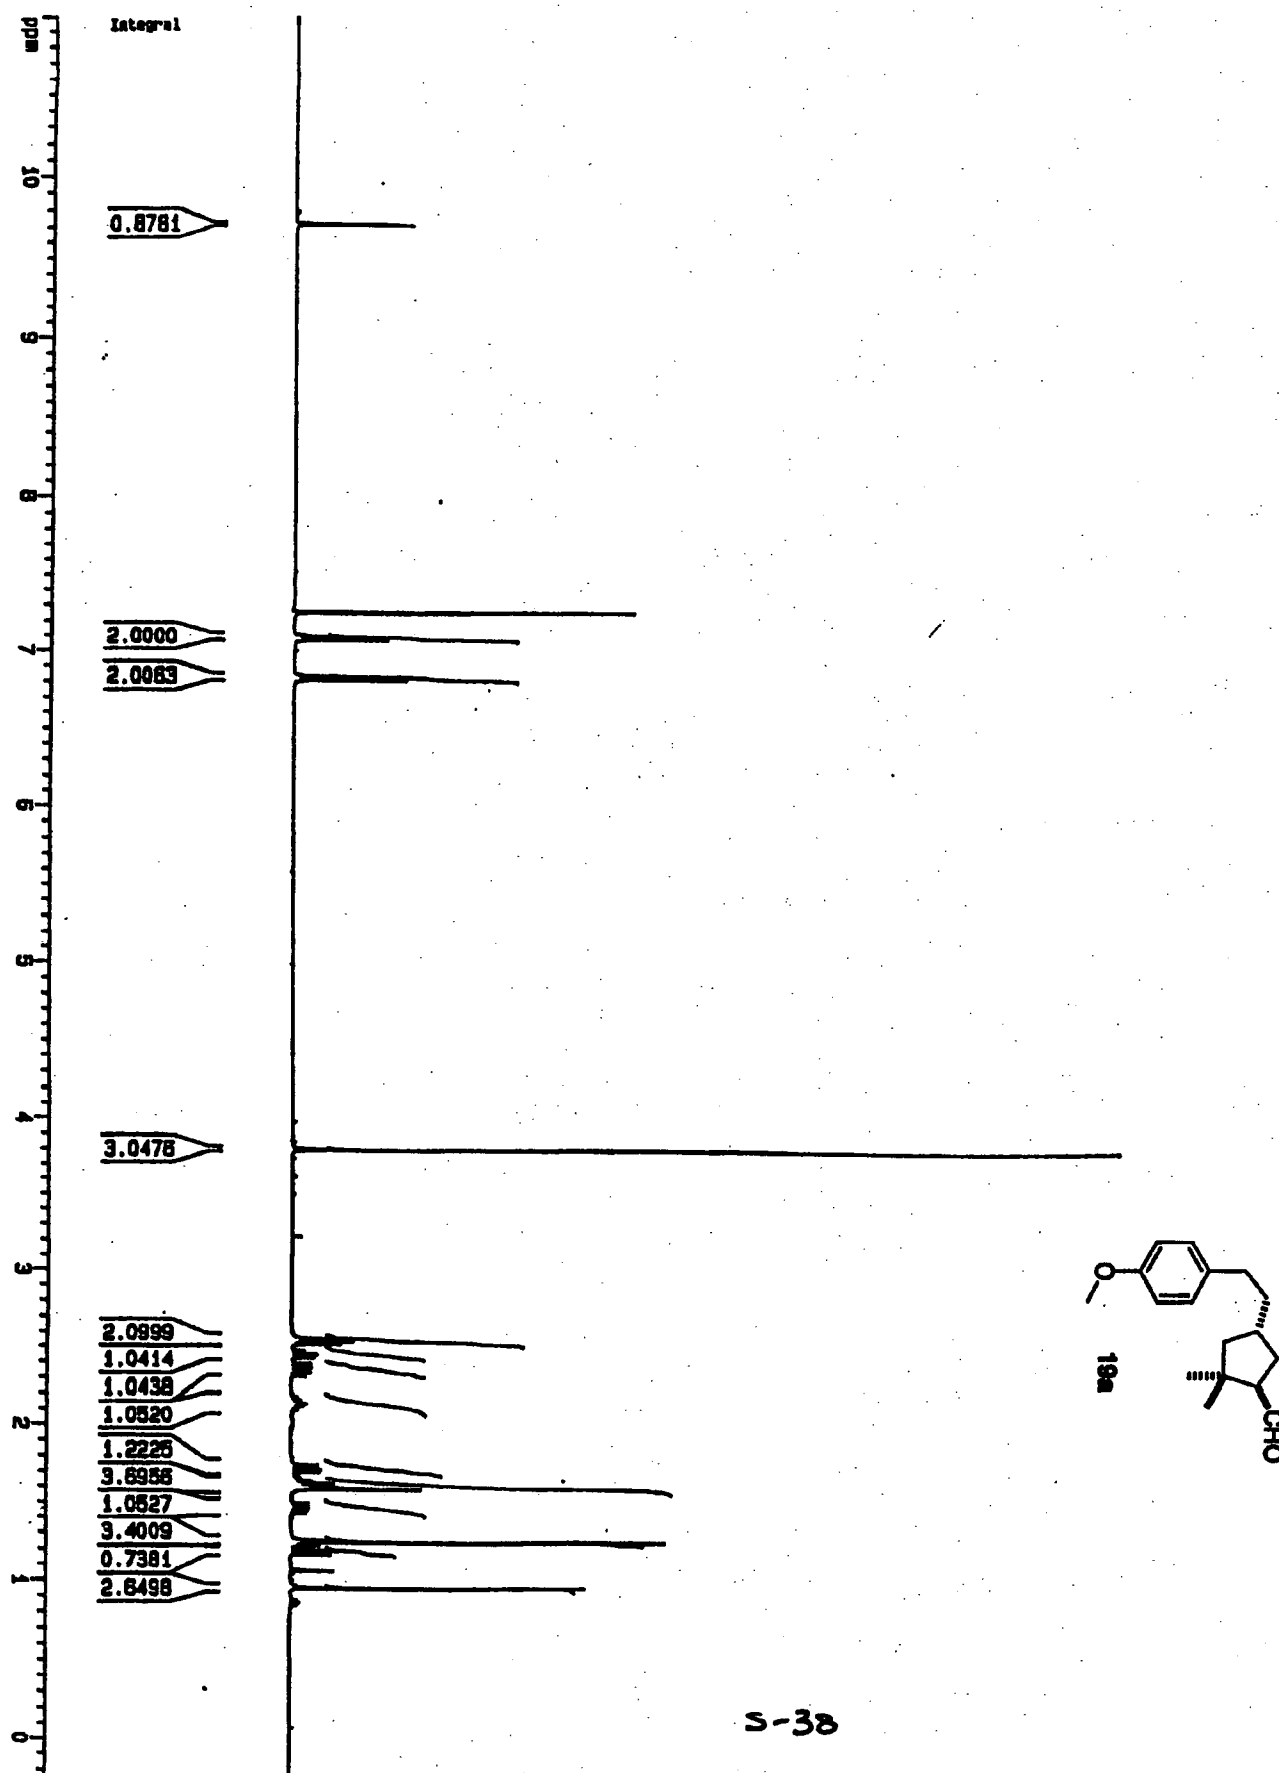

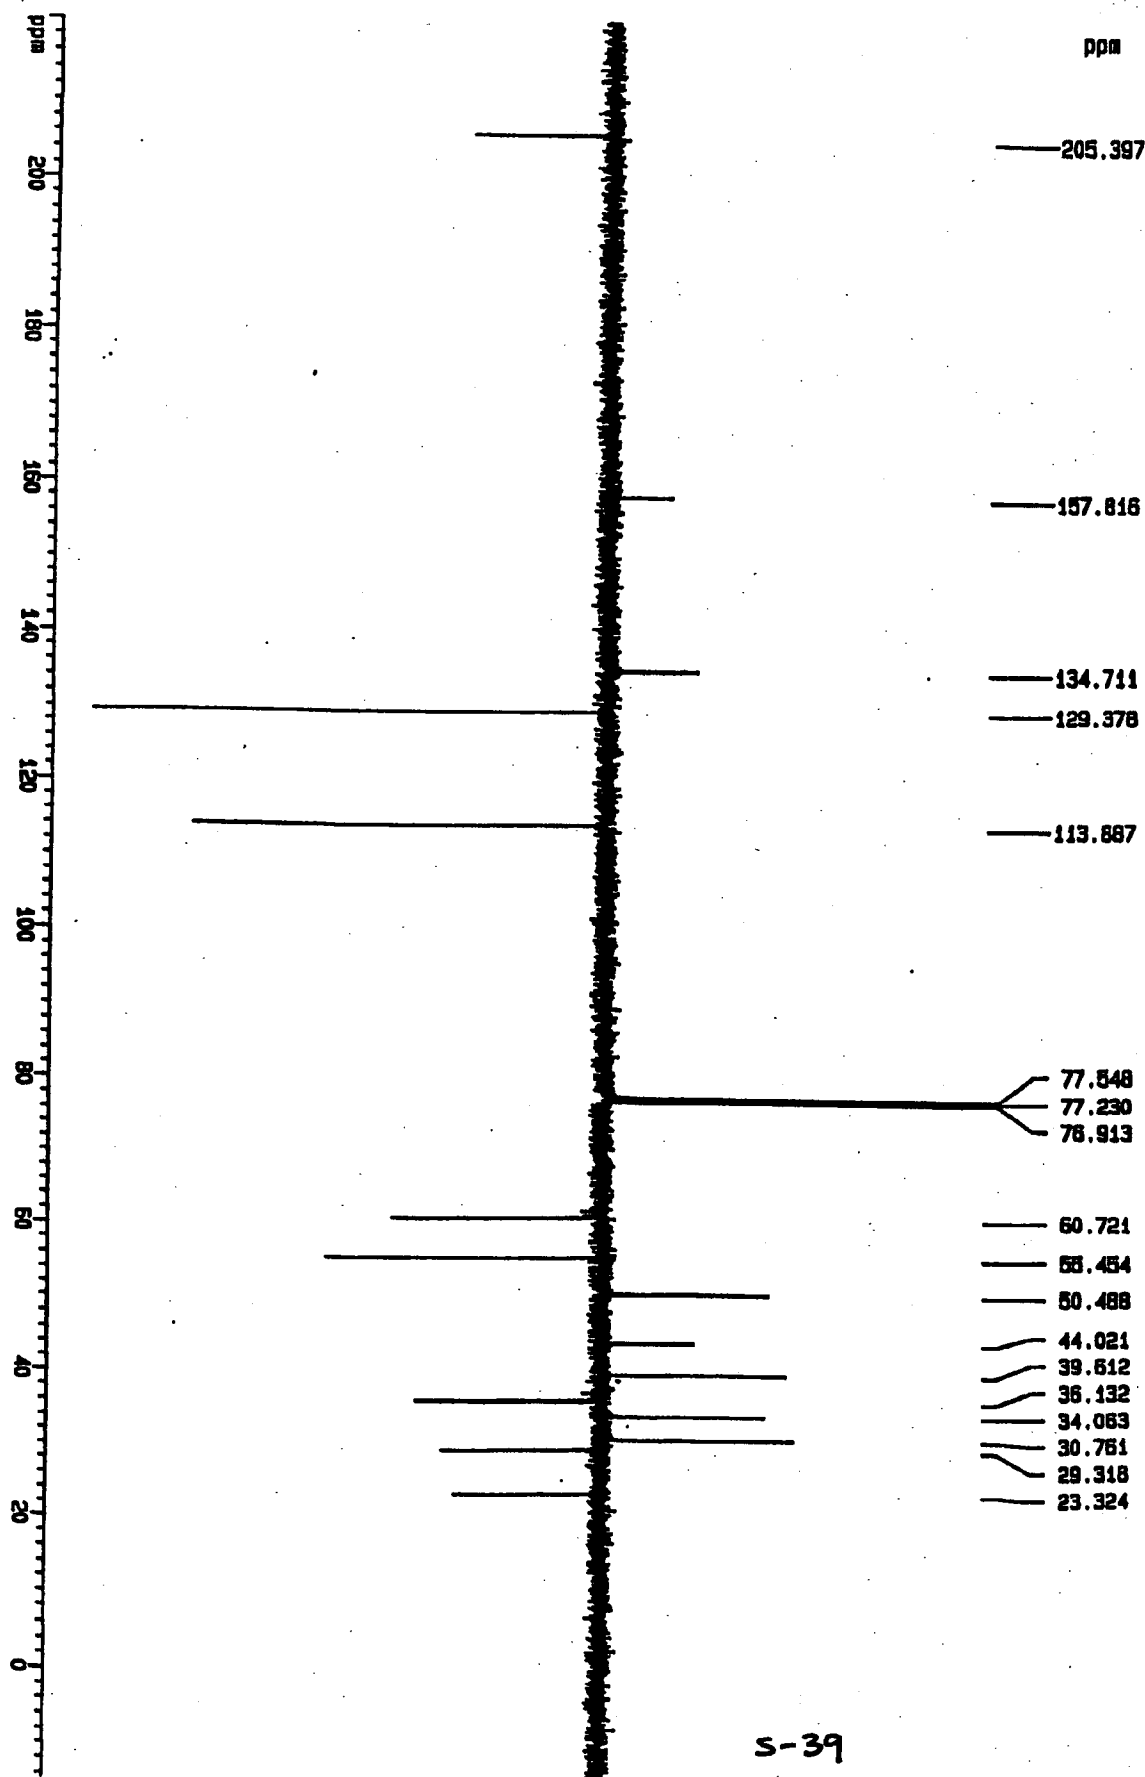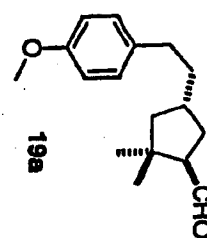

S-39

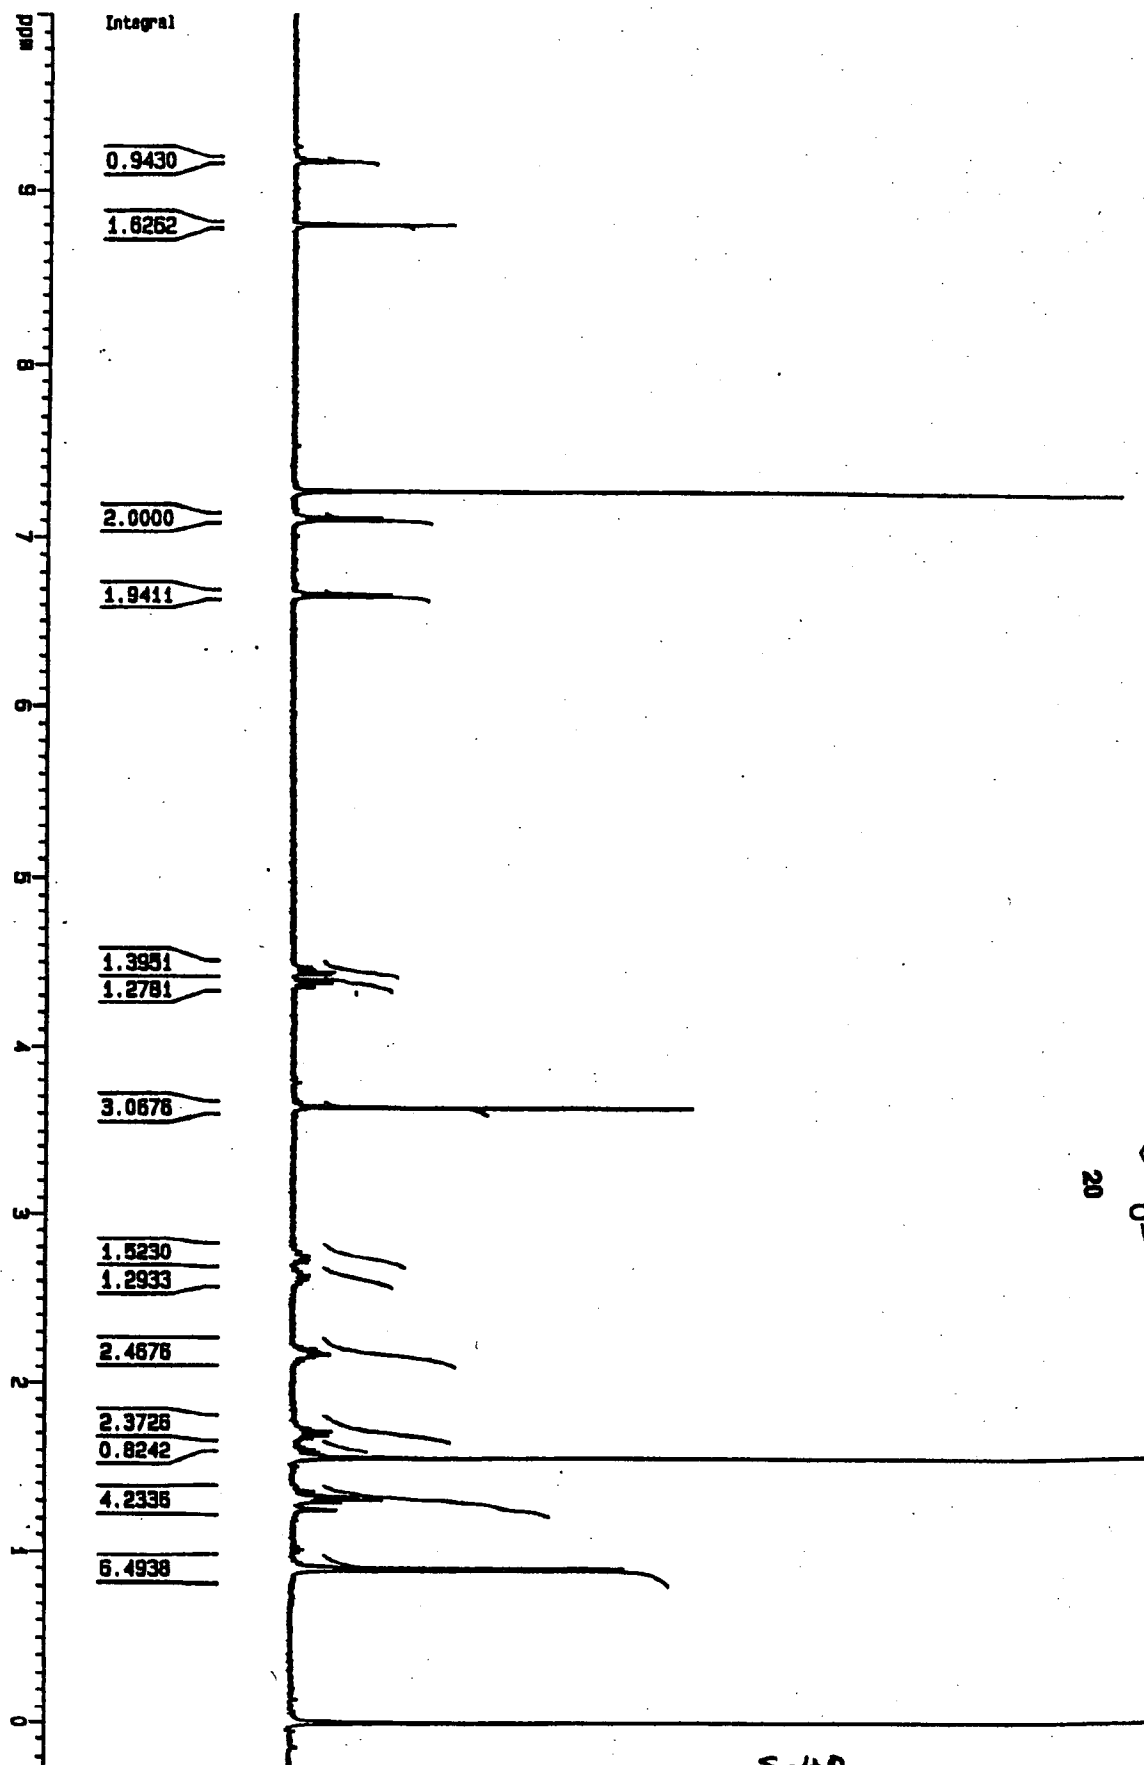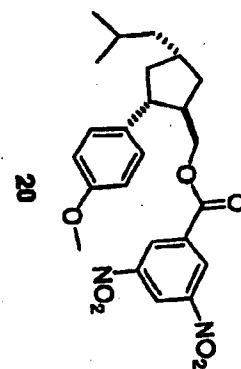

Supplement: Supplementary file 1 [file 5175118]
